# Supplementary material for: Funding and policy incentives to encourage implementation of point-of-care C-reactive protein testing for lower respiratory tract infection in NHS primary care: a mixed-methods evaluation
Source: PubMed Central journal article supplement (PMC6224752; doi:10.1136/bmjopen-2018-024558), 2018-10-25
Supplement: bmjopen-2018-024558.draft_revisions.pdf [file bmjopen-2018-024558.draft_revisions.pdf]

# BMJ Open

BMJ Open is committed to open peer review. As part of this commitment we make the peer review history of every article we publish publicly available.

When an article is published we post the peer reviewers' comments and the authors' responses online. We also post the versions of the paper that were used during peer review. These are the versions that the peer review comments apply to.

The versions of the paper that follow are the versions that were submitted during the peer review process. They are not the versions of record or the final published versions. They should not be cited or distributed as the published version of this manuscript.

BMJ Open is an open access journal and the full, final, typeset and author-corrected version of record of the manuscript is available on our site with no access controls, subscription charges or pay-per-view fees (<http://bmjopen.bmj.com>).

If you have any questions on BMJ Open's open peer review process please email [info.bmjopen@bmj.com](mailto:info.bmjopen@bmj.com)

# BMJ Open

## Funding and policy incentives to encourage implementation of point-of-care C-reactive protein testing for lower respiratory tract infection in NHS primary care: a mixed-methods evaluation

|                               |                                                                                                                                                                                                                                                                                                                                                                                                                                                                                                                                                                                                                                                        |
|-------------------------------|--------------------------------------------------------------------------------------------------------------------------------------------------------------------------------------------------------------------------------------------------------------------------------------------------------------------------------------------------------------------------------------------------------------------------------------------------------------------------------------------------------------------------------------------------------------------------------------------------------------------------------------------------------|
| Journal:                      | <i>BMJ Open</i>                                                                                                                                                                                                                                                                                                                                                                                                                                                                                                                                                                                                                                        |
| Manuscript ID                 | bmjopen-2018-024558                                                                                                                                                                                                                                                                                                                                                                                                                                                                                                                                                                                                                                    |
| Article Type:                 | Research                                                                                                                                                                                                                                                                                                                                                                                                                                                                                                                                                                                                                                               |
| Date Submitted by the Author: | 01-Jun-2018                                                                                                                                                                                                                                                                                                                                                                                                                                                                                                                                                                                                                                            |
| Complete List of Authors:     | Johnson, Matthew; Faculty of Health Sciences, University of Southampton, NIHR CLAHRC Wessex Data Science Hub<br>Cross, Liz; NIHR CLARHC East of England, Attenborough Surgery, Bushey Medical Centre, Herts Valleys Clinical Commissioning Group<br>Sandison, Nick; Faculty of Health Sciences, University of Southampton, NIHR CLAHRC Wessex<br>Stevenson, Jamie; Faculty of Health Sciences, University of Southampton, NIHR CLAHRC Wessex<br>Monks, T; Faculty of Health Sciences, University of Southampton, NIHR CLAHRC Wessex Data Science Hub<br>Moore, Michael; University of Southampton Medical School, Primary Care and Population Sciences |
| Keywords:                     | Health policy < HEALTH SERVICES ADMINISTRATION & MANAGEMENT, PRIMARY CARE, Respiratory infections < THORACIC MEDICINE                                                                                                                                                                                                                                                                                                                                                                                                                                                                                                                                  |
|                               |                                                                                                                                                                                                                                                                                                                                                                                                                                                                                                                                                                                                                                                        |

SCHOLARONE™  
Manuscripts

1  
2  
3 1 **Funding and policy incentives to encourage implementation of point-of-care**  
4 2 **C-reactive protein testing for lower respiratory tract infection in NHS primary**  
5 3 **care: a mixed-methods evaluation**  
6  
7  
8  
9

10 5 **Matthew Johnson**

11 6 Matt.Johnson@soton.ac.uk

12 7 NIHR CLAHRC Wessex Data Science Hub, Faculty of Health Sciences, University of Southampton, UK  
13  
14  
15

16 8  
17 9 **Liz Cross**

18 10 liz.cross@nhs.net

19 11 NIHR CLARHC East of England, Attenborough Surgery, Bushey Medical Centre, Herts Valleys Clinical  
20 12 Commissioning Group, UK  
21  
22  
23

24 13  
25 14 **Nick Sandison**

26 15 N.J.Sandison@soton.ac.uk

27 16 NIHR CLAHRC Wessex, Faculty of Health Sciences, University of Southampton, UK  
28  
29  
30

31 17  
32 18 **Jamie Stevenson**

33 19 jamie.stevenson@soton.ac.uk

34 20 NIHR CLAHRC Wessex, Faculty of Health Sciences, University of Southampton, UK  
35  
36  
37

38 21  
39 22 **Thomas Monks**

40 23 thomas.monks@soton.ac.uk

41 24 NIHR CLAHRC Wessex Data Science Hub, Faculty of Health Sciences, University of Southampton, UK  
42  
43  
44

45 25  
46 26 **Michael Moore (corresponding author)**

47 27 mvm198@soton.ac.uk

48 28 Head of Academic Unit, Primary Care and Population Sciences, University of Southampton  
49  
50  
51  
52  
53  
54  
55  
56  
57  
58  
59  
60

## 33 **Abstract**

34 **Objectives:** Utilisation of point-of-care C-reactive protein testing for lower respiratory tract infection  
35 has been limited in UK primary care, with costs and funding suggested as important barriers. We aimed  
36 to use existing National Health Service funding and policy mechanisms to alleviate these barriers, and  
37 engage with clinicians and healthcare commissioners to encourage implementation.

38 **Design:** A mixed-methods study design was adopted, including a qualitative survey to identify  
39 clinicians' and commissioners' perceived benefits, barriers and enablers post-implementation, and  
40 quantitative analysis of results from a real-world implementation study.

41 **Interventions:** We developed a funding specification to underpin local reimbursement of general  
42 practices for test delivery based on an item of service payment. We also created training and  
43 administrative materials to facilitate implementation by reducing organisational burden. The  
44 implementation study provided intervention sites with a testing device and supplies, training and  
45 practical assistance.

46 **Results:** Despite engagement with several groups, implementation and uptake of our funding  
47 specification were limited. Survey respondents confirmed costs and funding as important barriers in  
48 addition to physical constraints and operational barriers, and cited training and the value of a local  
49 champion as enablers. The implementation study demonstrated reduced rates of antibiotic  
50 prescription and follow-up consultation amongst intervention sites.

51 **Conclusions:** Although survey respondents highlighted the clinical benefits, funding remains a  
52 barrier to implementation in UK primary care, and appears not to be alleviated by the existing financial  
53 incentives available to commissioners. The potential to meet incentive targets using lower cost  
54 methods, a lack of policy consistency, or competing financial pressures and commissioning programmes  
55 may be important determinants of local priorities. An implementation champion could help to catalyse  
56 support and overcome operational barriers at the local level, but widespread implementation is likely

1  
2  
3 57 to require national policy change. Successful implementation may reproduce antibiotic prescribing  
4  
5 58 reductions observed in research studies.  
6  
7  
8  
9

## 60 **Strengths and limitations of this study**

- 61 • Use of a mixed-methods study design to assess the benefits, barriers and enablers of  
62 implementation from multiple perspectives.
- 63 • The study did not involve research funding for participating sites to enable evaluation of the  
64 impact of real-world financial structures associated with NHS commissioning.
- 65 • Development of a pack of resources that could contribute to future implementation projects.
- 66 • The study was undertaken against a background of general financial constraint within the NHS,  
67 which may have adversely impacted upon outcomes.

## 69 **Background**

70 Acute uncomplicated lower respiratory tract infection (LRTI) is the one of the commonest acute illnesses  
71 managed in primary care, and even in low antibiotic prescribing countries most patients receive  
72 antibiotics<sup>1 2</sup>. There is a clear national and international agenda to reduce unnecessary antibiotic  
73 prescribing<sup>3</sup>. The recently updated Cochrane review<sup>4</sup> of antibiotics for acute bronchitis demonstrated  
74 modest benefits, with a reduction of cough duration of around half a day. These findings were not  
75 replicated in a recently published large trial of antibiotics against placebo<sup>5</sup>. Limited benefit was  
76 demonstrated from antibiotics likely to be balanced by harms, and no subgroup was identified in whom  
77 there was a clinically relevant benefit<sup>5 6</sup>.

78 In the absence of clear benefit then what are the drivers of continued prescribing? Patients are  
79 concerned about their symptoms<sup>7</sup>, and clinicians are worried about missing severe infection and to  
80 avoid medico-legal consequences<sup>7-9</sup>. However, continued prescribing of antibiotics carries direct  
81 prescribing costs, increased re-consultations<sup>10</sup> and the major threat of antibiotic resistance<sup>11</sup>. Moreover,

1  
2  
3 82 a large cohort study has shown that adverse events following primary care consultation with LRTI  
4  
5 83 patients are rare, and may not be directly influenced by prescribing strategy<sup>12</sup>.

6  
7  
8 84 There is evidence that antibiotic prescribing in LRTI may be limited by appropriate use of near patient  
9  
10 85 tests (NPT)<sup>13-15</sup>. Two candidates are available: C-reactive protein (CRP) and procalcitonin (PCT)<sup>16-18</sup>. An  
11  
12 86 individual patient data review and meta-analysis supported the use of PCT to guide antibiotic use in  
13  
14 87 acute settings including primary care, emergency units and intensive care, and demonstrated equivalent  
15  
16 88 clinical outcomes with reduced antibiotic uptake<sup>19</sup>. Similarly, a recent Cochrane review examining the  
17  
18 89 role of CRP in acute respiratory illness in primary care<sup>20</sup> included six trials with 3,284 participants and  
19  
20 90 demonstrated a reduction in antibiotic use, although the results were interpreted with caution due to a  
21  
22 91 high degree of heterogeneity. The recently published National Institute for Clinical Excellence (NICE)  
23  
24 92 pneumonia guidelines<sup>21</sup> have also endorsed the use of CRP to aid decision making in primary care,  
25  
26 93 selecting this ahead of PCT given the current non-availability of an NPT for PCT.

27  
28  
29 94 Several trials have explored the use of CRP in the primary care setting for management of LRTI, either  
30  
31 95 alone or in combination with a communications skills training package, and have demonstrated a  
32  
33 96 substantial reduction in antibiotic prescribing<sup>13-15</sup>. Although CRP is widely used in Scandinavian countries  
34  
35 97 uptake has been limited in the UK, despite evidence of effectiveness in trial contexts to direct rational  
36  
37 98 prescribing for LRTI. There is some question, however, of the effectiveness of CRP once adopted in  
38  
39 99 clinical practice; results of tests performed on those with upper respiratory tract infection were found to  
40  
41 100 have been misinterpreted, and modest effects on prescribing described<sup>22</sup>. Some have questioned  
42  
43 101 whether reduced antibiotic prescribing will be seen following implementation in low prescribing  
44  
45 102 settings<sup>23</sup>, while others have reported CRP being the main determinant of antibiotic prescription in  
46  
47 103 observational cohorts<sup>24</sup>.

48  
49  
50  
51 104 The reasons for the delayed uptake of NPT in the UK are not clear. Tests to reduce diagnostic  
52  
53 105 uncertainty were supported by primary care physicians in a multi-country study including the UK<sup>25</sup>.  
54  
55 106 Although studies suggest that CRP is a cost-effective means of addressing LRTI in primary care, there is

1  
2  
3 107 evidence that concerns around costs and funding remain a barrier to widespread implementation<sup>26</sup>. As  
4  
5 108 the UK National Health Service (NHS) model of primary care does not include item of service payments,  
6  
7 109 implementation of Point of Care testing (PoC) outside of a research setting would generate additional  
8  
9 110 work and costs for initial purchase, maintenance and consumables, whereas antibiotic prescriptions  
10  
11 111 have no direct cost at practice level. One plausible way to increase utilisation of CRP PoC would be the  
12  
13 112 introduction of an item of service payment for use of the test in management of LRTI. The NHS England  
14  
15 113 General Medical Services contract, in addition to defining the scope of standard primary care services to  
16  
17 114 be delivered by general practices, also includes provision for opt-in to the delivery of additional, 'locally  
18  
19 115 enhanced' services (LES)<sup>27</sup>. This study was based on the hypothesis that the LES scheme may provide a  
20  
21 116 mechanism to introduce a financial incentive to uptake of CRP PoC for the management of LRTI in an  
22  
23 117 NHS primary care setting.

24  
25  
26 118 We aimed to evaluate the efficacy of an item of service payment framework introduced at the local  
27  
28 119 level by way of the LES scheme as a means of encouraging implementation amongst clinicians and  
29  
30 120 healthcare commissioners. We also aimed to work with other groups and localities to explore  
31  
32 121 alternative approaches to implementation, and to identify the perceived benefits, barriers and  
33  
34 122 enablers using a post-implementation survey.  
35  
36  
37

38 123

## 39 124 **Methods**

### 40 125 **Leveraging funding and policy incentives**

41  
42  
43  
44 126 Our work has concentrated on making use of the opportunities afforded by existing NHS funding and  
45  
46 127 policy mechanisms to encourage implementation of CRP PoC in primary care. We did not provide any  
47  
48 128 research funding to participating organisations to ensure that successful implementation was not  
49  
50 129 artificial, and could potentially be reproduced by others in the context of the real-world financial  
51  
52 130 structures and constraints associated with healthcare commissioning in the NHS. All work in this  
53  
54 131 area was undertaken during 2015 and 2016.  
55  
56  
57  
58  
59  
60

1  
2  
3 132 We developed a standard LES specification to underpin local implementation, establishing a funding  
4  
5 133 framework of reimbursement of general practices by Clinical Commissioning Groups (CCGs) for CRP PoC  
6  
7 134 on a unit basis. In view of the importance given to budgetary concerns by commissioners considering  
8  
9 135 CRP implementation<sup>26</sup>, CCGs may be motivated by its potential to open access to national funding  
10  
11 136 associated with achieving the NHS England 'Quality Premium' (QP) target for reduced antibiotic  
12  
13 137 prescribing in primary care<sup>28</sup>.

16 138 Our research group, NIHR CLAHRC Wessex, is funded by both the National Institute for Health  
17  
18 139 Research (NIHR) and partner organisations (including CCGs) within the local health system. Partner  
19  
20 140 funding contributions may be monetary, or comprised of research study involvement. Our locality  
21  
22 141 covers nine CCGs, each of whom had the opportunity to fulfil this funding obligation by participating  
23  
24 142 in a CRP implementation study, or similar research. As well as this benefit, there was further  
25  
26 143 opportunity for any participation costs to be partially or fully offset if the QP was achieved as a  
27  
28 144 result.

### 31 145 **Engaging with the NHS**

34 146 Using materials from the GRACE Intro study<sup>15</sup> we developed resources including an online training  
35  
36 147 course for general practitioners on the use of CRP, a clinical audit form and patient information  
37  
38 148 leaflet<sup>29</sup>. All resources were made available to interested organisations as a means of facilitating  
39  
40 149 implementation by reducing the associated administrative burden.

43 150 We visited clinicians and healthcare commissioners in our locality to generate interest, and made  
44  
45 151 presentations at locality events to promote the LES framework. We also attended an NIHR CLARHC  
46  
47 152 Wessex showcase event to which local CCGs were invited. We followed up additional enquiries from  
48  
49 153 other groups outside of our locality who were interested in CRP implementation by offering visits  
50  
51 154 and presentations, and sharing the resources developed for our local study. Resources were shared  
52  
53 155 with ten groups across the country.



1  
2  
3 156 **Post-implementation survey**  
4

5  
6 157 In August 2017, following our period of NHS engagement, we issued an electronic survey to a  
7  
8 158 convenience sample of clinicians and commissioners who had expressed an interest in, or were known  
9  
10 159 to have contributed to, CRP implementation projects. Overall, nineteen individuals were invited to  
11  
12 160 participate, including healthcare commissioners, pharmacists, primary and secondary care clinicians,  
13  
14 161 and public health professionals.  
15

16  
17 162 We adopted a qualitative approach to explore in more depth the factors motivating respondents' initial  
18  
19 163 interest, their experience of the implementation process and perceived barriers and enablers. Survey  
20  
21 164 questions were written in line with these underlying objectives as deductively generated main themes<sup>30</sup>  
22  
23 165 **(box 1)**.  
24  
25

26 We asked participants:

- 27 • What were your/your organisation's reasons for implementing CRP testing?
- 28 • What was your experience of implementing and using CRP testing, and what is happening now?
- 29 • Which aspects of the implementation worked well?
- 30 • What were the barriers to implementation and/or continued use?
- 31 • How did you overcome these barriers?
- 32 • What would have helped, or would help in the future to encourage continued use?
- 33 • What would facilitate the implementation process?
- 34 • What would be your recommendations for those looking to implement CRP testing in the future?

35 **Box 1: Post-implementation survey questions**  
36

37 166  
38 167 Following the method of thematic analysis described by Nowell and colleagues<sup>31</sup>, three members of the  
39  
40 168 research team (MJ, NS, TM) individually reviewed all survey responses to inductively identify more  
41  
42 169 specific subthemes. Reviewers took a systematic and iterative approach to analysis, later using  
43  
44 170 researcher triangulation to reach consensus.  
45  
46  
47  
48  
49  
50  
51  
52  
53  
54  
55  
56  
57  
58  
59  
60

Funded by an NHS England Innovation Challenge Prize, an implementation study was undertaken in Herts Valleys CCG to evaluate CRP utilisation over three winter months (November 2016 – January 2017) and in five general practices, purposively sampled using standardised practice-level prescribing data to target high and medium antibiotic prescribers. The study aimed to evaluate whether, compared to standard care, the availability of CRP PoC for LRTI in primary care was associated with reduced acute and follow-up antibiotic prescribing, and unscheduled primary care reattendances and healthcare contacts in the 28 days following presentation.

Participating practices received an intervention consisting of one testing device and supplies to perform 100 tests, training on the NICE guidelines and equipment use, a review visit and practical assistance from the study team where appropriate; all other costs were borne by the practice. Each practice was free to select an appropriate device location and means of operationalising patient flow based on the physical layout of the practice, available resources and staff skill mix.

In line with the NICE guidelines, patients aged 18-65 presenting to intervention practices with suspected LRTI of less than three weeks' duration where there was diagnostic uncertainty were eligible to receive a test. Eligibility was assessed by the clinician during patient consultation. Patients with acute pneumonia, pregnant, immunocompromised, terminally ill or under follow up for Chronic Obstructive Pulmonary Disease were excluded<sup>21</sup>. As the offer was made on clinician discretion, and the patient entitled to refuse, some eligible patients did not receive a test. However, all eligible patients presenting to intervention practices were included in the evaluation, irrespective of whether they received a test.

The five intervention practices were compared to three Herts Valleys CCG control practices of similar size and prescribing level, all of which continued to provide standard care. Control practices did not receive training. One member of the study team (LC) conducted a retrospective electronic search at control practices to identify new clinical consultations (during the same study period) with patients who met the CRP eligibility criteria. Presentations were identified using a set of Read codes<sup>32</sup> commonly used to record clinical activity related to LRTI in NHS primary care, and relevant information collected for analytical purposes.

Results from the implementation study are given in **Appendix A**.

#### **Box 2: Herts Valleys CCG implementation study**

171

172

## **Results**

### **Adoption of the LES framework and implementation of CRP**

175 Whilst there was initial interest in CRP PoC facilitated by use of the LES framework, ultimately no  
176 CCGs within the NIHR CLAHRC Wessex locality participated in implementation projects. CRP was  
177 under consideration by one local CCG as part of a range of measures that might contribute to  
178 achieving a 'Quality, Innovation, Productivity and Prevention' programme target around improving  
179 detection of pneumonia in primary care, with the aim of enabling earlier intervention and reducing

1  
2  
3 180 hospital admissions. The CCG had planned to implement CRP across all of its general practices, but  
4  
5 181 concluded that the associated upfront capital cost was too substantial and did not proceed.

6  
7  
8 182 Another CCG outside of our locality was interested in more widespread CRP implementation based  
9  
10 183 on antibiotic prescribing reductions observed during a pilot undertaken in a single general practice.  
11  
12 184 Although ten testing devices were procured and were initially regularly used, declining utilisation in  
13  
14 185 the face of operational barriers prompted the CCG to cease procurement of PoC consumables.  
15  
16 186 Financial incentivisation by way of the LES framework was considered as a means of encouraging  
17  
18 187 utilisation, but ultimately failed to reengage interest.

19  
20  
21 188 We are not aware of any other CCGs having adopted the LES framework, or having engaged in  
22  
23 189 implementation projects.

#### 24 25 26 190 **Post-implementation survey**

27  
28 191 Of the nineteen individuals invited to participate, seven (37%) submitted full responses. Several  
29  
30 192 subthemes emerged from inductive analysis, with a high level of consistency amongst respondents  
31  
32 193 **(table 1)**.

33  
34  
35 194 All respondents reported being organisationally motivated by the potential for CRP PoC to help  
36  
37 195 reduce antibiotic prescribing, while some further specified a desire to reduce variation in prescribing  
38  
39 196 rates amongst practices in their locality. However, respondents also described mixed clinician  
40  
41 197 utilisation: while some regularly incorporated PoC into consultations for suspected LRTI, others did  
42  
43 198 not use it at all. Furthermore, one respondent noted that while utilisation had initially been high, it  
44  
45 199 had declined over time.

|                                                                                                                                                                                               |
|-----------------------------------------------------------------------------------------------------------------------------------------------------------------------------------------------|
| Benefits:                                                                                                                                                                                     |
| <ul style="list-style-type: none"><li>• A clinical aid to appropriate antibiotic prescribing</li><li>• An objective measure to improve patient confidence in the prescribing action</li></ul> |
| Barriers:                                                                                                                                                                                     |

|                                                                                                                                                                                                                                                                                                                      |
|----------------------------------------------------------------------------------------------------------------------------------------------------------------------------------------------------------------------------------------------------------------------------------------------------------------------|
| <ul style="list-style-type: none"> <li>• Limited time available during consultation</li> <li>• Layout of facility and placement of testing device</li> <li>• Cost of implementation and continued use</li> <li>• Source of funding</li> <li>• Resistance to change</li> <li>• Maintaining engagement</li> </ul>      |
| <b>Enablers:</b>                                                                                                                                                                                                                                                                                                     |
| <ul style="list-style-type: none"> <li>• Early adopters to share experience and provide mentorship</li> <li>• Training and education</li> <li>• Champions within practice/locality</li> <li>• Collaboration at local and national level</li> <li>• Better utilisation of IT to facilitate testing process</li> </ul> |
| <b>Table 1: Benefits, barriers and enablers of implementation</b>                                                                                                                                                                                                                                                    |

200

201 **Benefits**

202 Most respondents agreed that CRP is a valuable clinical aid to appropriate antibiotic prescribing for  
 203 patients with symptoms of LRTI. Furthermore, some highlighted its value as an objective measure to  
 204 improve patient confidence in the chosen prescribing action, particularly in consultation with those  
 205 who are “very keen” to receive antibiotics. Two respondents noted that, in their experience, patients  
 206 had responded positively to the test and were satisfied with the outcome.

207 **Barriers**

208 In general, respondents reported that interest amongst clinicians was sometimes poor, and  
 209 suggested a need for financial incentives and support to encourage widespread uptake. Most  
 210 mentioned cost pressures, while some questioned who should be responsible for funding: general  
 211 practices or the CCG. Despite the evidence base for the clinical benefits, one respondent suggested  
 212 that there remains a need to “clearly demonstrate short term benefits in costs, workload and safety”  
 213 to develop and maintain engagement.

214 Most respondents commented on the impact of operational constraints, such as the physical layout  
 215 of the practice, how to accommodate multiple users, and the time required to carry out the test,  
 216 particularly in the context of high workload and limited consultation duration. Although some  
 217 respondents argued that other benefits justified its use despite these barriers, others specifically

1  
2  
3 218 cited them as disincentives, especially for clinicians who may have a negative attitude to CRP or be  
4  
5 219 resistant to change.

## 6 7 8 220 **Enablers**

9  
10 221 Most respondents discussed the importance of collaboration, although interpretations of this  
11  
12 222 differed. Some suggested that early adopter sites share lessons learned to help others and avoid  
13  
14 223 duplicated effort. The value of training and education during the implementation process were  
15  
16 224 consistently emphasised, and development of a standard programme was suggested. Others  
17  
18 225 mentioned the role of NIHR in fostering collaborative working, and the potential for general practice  
19  
20 226 or CCG champions to improve engagement and resolve problems. Some respondents also suggested  
21  
22 227 better use of IT to facilitate testing. Specific examples included the deployment of standard  
23  
24 228 templates to record the test and result in the practice management system, and use of electronic  
25  
26 229 alerts during consultation to prompt clinicians to PoC if indicated.  
27  
28  
29

30 230

## 31 32 231 **Discussion**

### 33 34 232 **Summary of main findings**

35  
36  
37 233 Despite initial interest, there was no implementation in the NIHR CLAHRC Wessex locality, and no  
38  
39 234 CCGs formally adopted the LES framework. The research team were unable to gain significant  
40  
41 235 traction with CCG management, and when contact was established CCGs were unwilling to prioritise  
42  
43 236 antibiotic stewardship over other local initiatives. The policy levers seemed to have little impact in  
44  
45 237 this locality, where CCGs were struggling to remain in budget. The financial rewards arising from the  
46  
47 238 QP only applied to CCGs meeting financial targets. Elsewhere, one CCG implemented CRP and,  
48  
49 239 following declining utilisation in response to operational barriers, found that the LES framework was  
50  
51 240 insufficient as a mechanism to reengage interest.

52  
53  
54 241 Although the small sample size limits inference and generalisability, our post-implementation survey  
55  
56 242 identified several financial, operational and physical barriers in common with previous qualitative  
57  
58  
59

1  
2  
3 243 research<sup>26</sup>. Respondents confirmed that implementation would be unlikely without financial  
4  
5 244 incentives but also highlighted difficulties integrating PoC into practice workflow, and constraints  
6  
7 245 arising from a lack of dedicated space, equipment sharing and limited time. Reported enablers  
8  
9 246 included adequate training and the value of a local champion.

10  
11  
12 247 Some respondents also emphasised the clinical benefits of CRP, giving anecdotal examples of cases  
13  
14 248 where testing had prevented antibiotic prescription. The potential for more widespread repetition of  
15  
16 249 this outcome is suggested by quantitative results from the Herts Valley CCG implementation study,  
17  
18 250 where a successful, separately funded implementation scheme was run for a three month period,  
19  
20 251 driven by a local champion. Observation of substantial prescribing reductions amongst intervention  
21  
22 252 practices suggests that implementation in the NHS might replicate the prescribing reductions  
23  
24 253 reported in research studies.

#### 254 **Comparison with other literature**

255 We are unaware of any other implementation studies concerning CRP PoC in the UK. In other health  
256 settings PoC is widely adopted<sup>22</sup>, and following government directives has been introduced in the  
257 Netherlands<sup>33</sup>. The financial barriers to implementation have been identified in a previous study  
258 including European and UK participants<sup>23</sup>, which noted that countries with high rates of use had  
259 alternative reimbursement models, and that widespread implementation in Europe followed health  
260 policy change. The same study also highlighted issues around workflow and time as potential  
261 barriers to implementation in the UK.

#### 262 **Strengths and weaknesses**

263 Our study describes the results of attempts at CRP implementation without the resources associated  
264 with research, and without specific policy directives. It is unclear how generalisable our findings  
265 might be; it would appear that CCG partnership with NIHR CLAHRC Wessex and national level  
266 incentives via the QP should have maximised the potential for local implementation. The scheme

1  
2  
3 267 was devised during a time of general financial constraint within the NHS, which may have had  
4  
5 268 particular impact in the Wessex locality.

6  
7  
8 269 **Limitations around funding mechanisms**

9  
10 270 The criteria required to achieve the QP, even taking the antibiotic prescribing element alone, has  
11  
12 271 been inconsistent. Some changes have been significant, such as a move to greater emphasis on  
13  
14 272 antibiotic prescribing for urinary tract infection as of 2018/19<sup>28</sup>. Furthermore, as the QP is awarded  
15  
16 273 retrospectively and is contingent upon meeting other financial targets, the funding mechanism is not  
17  
18 274 guaranteed, making it difficult to engage commissioners and to create a firm financial framework to  
19  
20 275 underpin CRP implementation.

21  
22  
23 276 A further feature of the QP is that no method of achievement is stipulated; the antibiotic prescribing  
24  
25 277 element simply requires an absolute prescribing reduction. The NHS has reported a national ~7%  
26  
27 278 reduction in primary care coinciding with the implementation phase of this study<sup>34-36</sup>, which may  
28  
29 279 have resulted from a general policy shift and increased focus of clinical training in primary care. This  
30  
31 280 suggests that overall improvements could be gained and the QP target potentially achieved by way  
32  
33 281 of alternative, lower cost methods alone, negating commissioners' financial incentive for CRP  
34  
35 282 implementation irrespective of the clinical benefits.

36  
37  
38  
39 283 The pressures of multiple, competing commissioning programmes may limit engagement with  
40  
41 284 certain initiatives, while the overall funding structure of the NHS may also influence commissioners'  
42  
43 285 preferences and priorities. One CCG within our locality suggested that, despite evidence of a net cost  
44  
45 286 saving associated with CRP<sup>37</sup>, whilst the upfront implementation costs reside with primary care, any  
46  
47 287 savings would principally be realised by the secondary care sector. In this instance, therefore,  
48  
49 288 concerns that the costs and benefits of the initiative may be distinctly localised within separate areas  
50  
51 289 of the health system acted as a disincentive to its adoption.

52  
53  
54 290 **Implications**

1  
2  
3 291 Whilst the use of existing financial structures appeared appealing as a mechanism, it was not  
4  
5 292 possible to fully test the hypothesis that modest financial incentives to general practices at local  
6  
7 293 level would enable CRP implementation, as financial pressures impeded CCG adoption of the policy.  
8  
9 294 National incentives for CCGs did not appear to override the financial constraints because a) financial  
10  
11 295 rewards were only available to CCGs meeting financial targets, and b) antibiotic targets were being  
12  
13 296 achieved through other mechanisms not requiring financial investment.

14  
15  
16 297 Although a small case study suggests that implementation outside of research studies may result in  
17  
18 298 similar prescribing reductions, since it was driven by local investment and a local champion it may  
19  
20 299 not fully reflect implementation in routine practice, or be generalisable to other areas. Furthermore,  
21  
22 300 and recalling questions over the primacy of lower cost measures, the fact that this intervention  
23  
24 301 provided training and support in addition to testing materials limits the extent to which the  
25  
26 302 observed prescribing reductions can be confidently attributed to CRP PoC alone.

27  
28  
29 303 The value of an enthusiastic, local champion to catalyse support for implementation emerged from  
30  
31 304 both the qualitative and quantitative strands of this study. Knowledge mobilisation and  
32  
33 305 implementation in practice may be assisted by way of a Researcher-In-Residence model<sup>38</sup>, while  
34  
35 306 further qualitative and observational research could improve understanding of how champions are  
36  
37 307 able to persuade and engage clinicians and to encourage commissioners to look beyond the  
38  
39 308 immediate financial disincentives, and whether they may be effective in other areas and settings.  
40  
41 309 Further economic research might also model different modes of implementation to assess the costs  
42  
43 310 and consequences across the system, and to find alternative funding models to overcome the  
44  
45 311 financial barriers. Multi-purpose testing devices, for example, may have the advantage of spreading  
46  
47 312 investment across several funding streams.

48  
49  
50  
51 313 In conclusion, it seems unlikely that financial schemes falling outside of national policy will gain  
52  
53 314 much traction in a financially constrained NHS. Full-scale implementation of CRP PoC is likely to  
54  
55 315 require central implementation via government policy or contractual changes.



316

317

## 318 **Appendix A: Results from Herts Valleys CCG implementation study**

319 Five intervention practices with a total list size of 63,743 patients recorded 682 eligible LRTI  
 320 presentations during the study period, of which 176 (26%) involved a CRP test. Three control  
 321 practices recorded 258 presentations (based on the same eligibility criteria) from 35,928 patients.

322 Overall, fewer initial presentations to intervention practices resulted in antibiotic prescription over  
 323 the following 28 days (59% of initial presentations, as compared to 79%) and follow-up consultations  
 324 (30% compared to 38%), although there was little difference to antibiotic prescribing at follow-up  
 325 (both arms 68%) (**table 2**). Furthermore, initial presentations with antibiotic prescription then  
 326 resulting in follow-up consultation with an additional prescription were more common amongst  
 327 control practices (21% compared to 13%). As delayed prescribing was relatively infrequent at both  
 328 intervention and control practices all prescriptions were combined into a single outcome,  
 329 irrespective of delay.

|                                                                                                                               | Intervention arm (n = 682) |                 | Control arm (n = 258) |                 |
|-------------------------------------------------------------------------------------------------------------------------------|----------------------------|-----------------|-----------------------|-----------------|
|                                                                                                                               | Outcome events             | %               | Outcome events        | %               |
| <b>CRP test at initial presentation</b>                                                                                       | 176                        | 26              | -                     | -               |
| <b>Antibiotic prescription at initial presentation</b>                                                                        | 405                        | 59              | 204                   | 79              |
| <b>Follow-up consultation after initial presentation</b>                                                                      | 206                        | 30              | 99                    | 38              |
| <b>Antibiotic prescription at follow-up consultation</b>                                                                      | 140                        | 68 <sup>a</sup> | 67                    | 68 <sup>a</sup> |
| <b>Initial presentation with antibiotic prescription, then follow-up consultation with additional antibiotic prescription</b> | 92                         | 13              | 55                    | 21              |

**Table 2: Primary care healthcare events resulting from initial LRTI presentation**

*All percentages compared to number of initial presentations, except (<sup>a</sup>) compared to number of follow up consultations*

330

331 Using logistic regression, we found that the odds of antibiotic prescribing at initial presentation  
 332 (where acute and delayed prescribing were grouped into a single outcome) were reduced by 62%  
 333 amongst intervention practices, and the odds of follow up consultation reduced by 32% (**table 3**). In  
 334 each case we adjusted for patient age (modelled as a binary variable with categories '< 44' and '≥  
 335 45'), and found that each outcome was more likely amongst presenting patients in the older age  
 336 category.

| Outcome                                           | Variable           | Adjusted OR (95% CI) | p-value |
|---------------------------------------------------|--------------------|----------------------|---------|
| Antibiotic prescription at initial presentation   | <b>Study arm</b>   |                      |         |
|                                                   | Control            | <i>Reference</i>     |         |
|                                                   | Intervention       | 0.38 (0.27, 0.53)    | < 0.001 |
|                                                   | <b>Patient age</b> |                      |         |
|                                                   | < 44               | <i>Reference</i>     |         |
|                                                   | ≥ 45               | 1.35 (1.02, 1.77)    | 0.035   |
| Follow-up consultation after initial presentation | <b>Study arm</b>   |                      |         |
|                                                   | Control            | <i>Reference</i>     |         |
|                                                   | Intervention       | 0.68 (0.51, 0.92)    | 0.013   |
|                                                   | <b>Patient age</b> |                      |         |
|                                                   | < 44               | <i>Reference</i>     |         |
|                                                   | ≥ 45               | 1.40 (1.06, 1.85)    | 0.019   |

**Table 3: Multivariate logistic regression models for the association of practice-level intervention with antibiotic prescribing at initial presentation and follow-up consultation after initial presentation**

337

338

339 **List of abbreviations**

340 LRTI: Lower respiratory tract infection; NPT: Near patient test; CRP: C-reactive protein; PCT:

341 Procalcitonin; NICE: National Institute for Clinical Excellence; NHS: National Health Service; PoC:

342 Point of care testing; LES: Locally Enhanced Service; CCG: Clinical Commissioning Group; QP: NHS

343 England Quality Premium; NIHR: National Institute for Health Research

344

345 **Declarations**346 **Ethical approval**

347 The Integrated Research Application System (IRAS) confirmed that formal ethical approval was not

348 required for the Herts Valleys CCG implementation study; a service evaluation project.

349 **Funding statement**

350 This research was funded by the National Institute for Health Research (NIHR) Collaboration for

351 Leadership in Applied Health Research and Care Wessex at University Hospital Southampton NHS

352 Foundation Trust. The views expressed are those of the author(s) and not necessarily those of the

353 NHS, the NIHR or the Department of Health and Social Care.

1  
2  
3 354 The Herts Valleys CCG implementation study was separately supported by a 2015/16 NHS England  
4  
5 355 Innovation Challenge Prize, Acorn award.  
6

7  
8 356 **Competing interests**

9 357 MJ, NS, JS, TM and MM have no competing interests to declare. LC has received honoraria from  
10  
11 358 Abbott Laboratories and Roche Diagnostics Ltd for speaking events.  
12

13  
14 359 **Authors' contributions**

15 360 MJ carried out quantitative analysis and wrote the paper with contributions from MM. MJ and NS  
16  
17 361 developed the post-implementation survey and, with TM, carried out qualitative analysis. LC carried  
18  
19 362 out the Herts Valleys CCG implementation study. JS, NS and MM developed the LES framework and  
20  
21 363 other resources, and engaged with the NHS. TM provided methodological input and MM provided  
22  
23 364 clinical guidance. All authors commented on drafts of the paper and have read and approved the  
24  
25 365 final manuscript.  
26  
27

28  
29 366 **Patient consent for publication**

30  
31 367 Not applicable.  
32

33  
34 368 **Data sharing statement**

35 369 Not applicable.  
36  
37

38 370 **Acknowledgements**

39  
40 371 The authors thank Elsie Griffins and Dr Denise Knight for their support for the Herts Valleys CCG  
41  
42 372 implementation study.  
43  
44

45 373  
46  
47

48 374 **References**

- 49  
50 375 1. Butler CC, Hood K, Verheij T, et al. Variation in antibiotic prescribing and its impact on recovery in  
51 376 patients with acute cough in primary care: prospective study in 13 countries. *BMJ*  
52 377 2009;338(b2242)  
53 378 2. Akkerman AE, van der Wouden JC, Kuyvenhoven MM, et al. Antibiotic prescribing for respiratory  
54 379 tract infections in Dutch primary care in relation to patient age and clinical entities. *J*  
55 380 *Antimicrob Chemother* 2004;54(6):1116-21. doi: 10.1093/jac/dkh480 [published Online First:  
56 381 2004/11/18]  
57  
58  
59  
60

- 382 3. Davies SC. Annual Report of the Chief Medical Officer, Volume Two, 2011, Infections and the rise  
383 of antimicrobial resistance. London: Department of Health 2013.
- 384 4. Smith SM, Fahey T, Smucny J, et al. Antibiotics for acute bronchitis. *Cochrane Database Syst Rev*  
385 2014(3):CD000245. doi: 10.1002/14651858.CD000245.pub3 [published Online First:  
386 2014/03/04]
- 387 5. Little P, Stuart B, Moore M, et al. Amoxicillin for acute lower-respiratory-tract infection in primary  
388 care when pneumonia is not suspected: a 12-country, randomised, placebo-controlled trial.  
389 *The Lancet Infectious Diseases* 2013;13(2):123-29. doi: 10.1016/s1473-3099(12)70300-6
- 390 6. Moore M, Stuart B, Coenen S, et al. Amoxicillin for acute lower respiratory tract infection in  
391 primary care: subgroup analysis of potential high-risk groups. *Br J Gen Pract*  
392 2014;64(619):e75-80. doi: 10.3399/bjgp14X677121 [published Online First: 2014/02/26]
- 393 7. Cornford CS. Why patients consult when they cough: a comparison of consulting and non-  
394 consulting patients. *British Journal of General Practice* 1998;48(436):1751-4.
- 395 8. Little P, Watson L, Morgan S, et al. Antibiotic prescribing and admissions with major suppurative  
396 complications of respiratory tract infections: a data linkage study. *British Journal of General*  
397 *Practice* 2002;52:187-93.
- 398 9. Winchester CC, Macfarlane TV, Thomas M, et al. Antibiotic prescribing and outcomes of lower  
399 respiratory tract infection in UK primary care. *Chest* 2009;135(5):1163-72. doi:  
400 10.1378/chest.07-2940 [published Online First: 2009/05/08]
- 401 10. Moore M, Little P, Rumsby K, et al. Effect of antibiotic prescribing strategies and an information  
402 leaflet on longer-term reconsultation for acute lower respiratory tract infection. *Br J Gen*  
403 *Pract* 2009;59(567):728-34. doi: 10.3399/bjgp09X472601 [published Online First:  
404 2009/10/22]
- 405 11. Goossens H, Ferech M, Vander Stichele R, et al. Outpatient antibiotic use in Europe and  
406 association with resistance: a cross-national database study. *The Lancet*  
407 2005;365(9459):579-87. doi: 10.1016/s0140-6736(05)70799-6
- 408 12. Little P, Stuart B, Smith S, et al. Antibiotic prescription strategies and adverse outcome for  
409 uncomplicated lower respiratory tract infections: prospective cough complication cohort  
410 (3C) study. *BMJ* 2017;357:j2148. doi: 10.1136/bmj.j2148 [published Online First:  
411 2017/05/24]
- 412 13. Cals JW, Butler CC, Hopstaken RM, et al. Effect of point of care testing for C reactive protein and  
413 training in communication skills on antibiotic use in lower respiratory tract infections: cluster  
414 randomised trial. *BMJ* 2009;338:b1374. doi: 10.1136/bmj.b1374 [published Online First:  
415 2009/05/07]
- 416 14. Cals JW, Schot MJ, de Jong SA, et al. Point-of-care C-reactive protein testing and antibiotic  
417 prescribing for respiratory tract infections: a randomized controlled trial. *Ann Fam Med*  
418 2010;8(2):124-33. doi: 10.1370/afm.1090 [published Online First: 2010/03/10]
- 419 15. Little P, Stuart B, Francis N, et al. Effects of internet-based training on antibiotic prescribing rates  
420 for acute respiratory-tract infections: a multinational, cluster, randomised, factorial,  
421 controlled trial. *The Lancet* 2013;382(9899):1175-82. doi: 10.1016/s0140-6736(13)60994-0
- 422 16. Briel M, Schuetz P, Mueller B, et al. Procalcitonin-Guided Antibiotic Use vs a Standard Approach  
423 for Acute Respiratory Tract Infections in Primary Care. *Arch Intern Med* 2008;168(18):2000-  
424 07.
- 425 17. Holm A, Pedersen SS, Nexoe J, et al. Procalcitonin versus C-reactive protein for predicting  
426 pneumonia in adults with lower respiratory tract infection in primary care. *British Journal of*  
427 *General Practice* 2007;57:555-60.
- 428 18. Christ-Crain M, Opal SM. Clinical review: The role of biomarkers in the diagnosis and  
429 management of community acquired pneumonia. *Critical Care* 2010;14(203) doi:  
430 10.1186/cc8155
- 431 19. Schuetz P, Briel M, Christ-Crain M, et al. Procalcitonin to guide initiation and duration of  
432 antibiotic treatment in acute respiratory infections: an individual patient data meta-analysis.

- 1  
2  
3 433 *Clin Infect Dis* 2012;55(5):651-62. doi: 10.1093/cid/cis464 [published Online First:  
4 434 2012/05/11]
- 5 435 20. Aabenhus R, Jensen JU, Jorgensen KJ, et al. Biomarkers as point-of-care tests to guide  
6 436 prescription of antibiotics in patients with acute respiratory infections in primary care.  
7 437 *Cochrane Database Syst Rev* 2014(11):CD010130. doi: 10.1002/14651858.CD010130.pub2  
8 438 [published Online First: 2014/11/07]
- 9 439 21. National Institute for Health and Care Excellence. Pneumonia in adults: diagnosis and  
10 440 management (CG191) 2014 [Available from: <https://www.nice.org.uk/guidance/cg191>  
11 441 accessed 13 March 2018.
- 12 442 22. André M, Schwan A, Odenholt I. The Use of CRP Tests in Patients with Respiratory Tract  
13 443 Infections in Primary Care in Sweden Can Be Questioned. *Scandinavian Journal of Infectious*  
14 444 *Diseases* 2009;36(3):192-97. doi: 10.1080/00365540410019372
- 15 445 23. Minnaard MC, van de Pol AC, Hopstaken RM, et al. C-reactive protein point-of-care testing and  
16 446 associated antibiotic prescribing. *Fam Pract* 2016;33(4):408-13. doi:  
17 447 10.1093/fampra/cmw039 [published Online First: 2016/05/28]
- 18 448 24. Jakobsen KA, Melbye H, Kelly MJ, et al. Influence of CRP testing and clinical findings on antibiotic  
19 449 prescribing in adults presenting with acute cough in primary care. *Scand J Prim Health Care*  
20 450 2010;28(4):229-36. doi: 10.3109/02813432.2010.506995 [published Online First:  
21 451 2010/08/14]
- 22 452 25. Tonkin-Crine S, Yardley L, Coenen S, et al. GPs' views in five European countries of interventions  
23 453 to promote prudent antibiotic use. *Br J Gen Pract* 2011;61(586):e252-61. doi:  
24 454 10.3399/bjgp11X572445 [published Online First: 2011/05/31]
- 25 455 26. Huddy JR, Ni MZ, Barlow J, et al. Point-of-care C reactive protein for the diagnosis of lower  
26 456 respiratory tract infection in NHS primary care: a qualitative study of barriers and facilitators  
27 457 to adoption. *BMJ Open* 2016;6(3):e009959. doi: 10.1136/bmjopen-2015-009959 [published  
28 458 Online First: 2016/03/05]
- 29 459 27. NHS England. NHS England Standard General Medical Services Contract 2017/18 2018 [Available  
30 460 from: <https://www.england.nhs.uk/gp/gp/v/investment/gp-contract/> accessed 13 March  
31 461 2018.
- 32 462 28. NHS England. Quality Premium 2018 [Available from:  
33 463 <https://www.england.nhs.uk/resources/resources-for-ccgs/ccg-out-tool/ccg-ois/qual-prem/>  
34 464 accessed 16 May 2018.
- 35 465 29. NIHR CLAHRC Wessex. Reducing unnecessary antibiotic prescribing in primary care 2018  
36 466 [Available from: <https://www.clahrc-wessex.nihr.ac.uk/theme/project/20> accessed 24th  
37 467 May 2018.
- 38 468 30. Braun V, Clarke V. Using thematic analysis in psychology. *Qualitative Research in Psychology*  
39 469 2006;3(2):77-101. doi: 10.1191/1478088706qp063oa
- 40 470 31. Nowell LS, Norris JM, White DE, et al. Thematic Analysis: Striving to Meet the Trustworthiness  
41 471 Criteria. *International Journal of Qualitative Methods* 2017;16:1-13. doi:  
42 472 10.1177/1609406917733847
- 43 473 32. Benson T. The history of the Read codes: the inaugural James Read Memorial Lecture 2011.  
44 474 *Journal of Innovation in Health Informatics* 2011;19(3):173-82. doi: 10.14236/jhi.v19i3.811
- 45 475 33. The Dutch College of General Practitioners (NHG). NHG-Standaard Acute hoesten (Acute cough  
46 476 guidelines) 2018 [Available from: <https://www.nhg.org/standaarden/volledig/nhg-standaard-acuut-hoesten> accessed 31st May 2018.
- 47 477
- 48 478 34. NHS England. Success in NHS push to reduce avoidable antibiotic prescribing 2016 [Available  
49 479 from: <https://www.england.nhs.uk/2016/03/antibiotic-prescribing/> accessed 17 May 2018.
- 50 480 35. NHS England. Antibiotic quality premium monitoring dashboard 2018 [Available from:  
51 481 <https://www.england.nhs.uk/resources/resources-for-ccgs/ccg-out-tool/ccg-ois/anti-dash/>  
52 482 accessed 17 May 2018.
- 53  
54  
55  
56  
57  
58  
59  
60

- 1  
2  
3 483 36. NHS Improvement. Helping GPs to cut antibiotic prescriptions by 2.6m in just one year 2016  
4 484 [Available from: [https://improvement.nhs.uk/news-alerts/helping-gps-cut-antibiotic-  
6 486 prescriptions/](https://improvement.nhs.uk/news-alerts/helping-gps-cut-antibiotic-<br/>5 485 prescriptions/) accessed 17 May 2018.  
7 487 37. Hunter R. Cost-effectiveness of point-of-care C-reactive protein tests for respiratory tract  
8 488 infection in primary care in England. *Adv Ther* 2015;32(1):69-85. doi: 10.1007/s12325-015-  
9 489 0180-x [published Online First: 2015/01/27]  
10 490 38. Marshall M, Pagel C, French C, et al. Moving improvement research closer to practice: the  
11 491 Researcher-in-Residence model. *BMJ Qual Saf* 2014;23(10):801-5. doi: 10.1136/bmjqs-2013-  
12 002779 [published Online First: 2014/06/05]

13 492  
14  
15  
16  
17  
18  
19  
20  
21  
22  
23  
24  
25  
26  
27  
28  
29  
30  
31  
32  
33  
34  
35  
36  
37  
38  
39  
40  
41  
42  
43  
44  
45  
46  
47  
48  
49  
50  
51  
52  
53  
54  
55  
56  
57  
58  
59  
60

**STROBE 2007 (v4) checklist of items to be included in reports of observational studies in epidemiology\***  
**Checklist for cohort, case-control, and cross-sectional studies (combined)**

| Section/Topic             | Item # | Recommendation                                                                                                                                                                                                                                                                                                                                                                                                                                                         | Reported on page #                                                                                                                                      |
|---------------------------|--------|------------------------------------------------------------------------------------------------------------------------------------------------------------------------------------------------------------------------------------------------------------------------------------------------------------------------------------------------------------------------------------------------------------------------------------------------------------------------|---------------------------------------------------------------------------------------------------------------------------------------------------------|
| Title and abstract        | 1      | (a) Indicate the study's design with a commonly used term in the title or the abstract                                                                                                                                                                                                                                                                                                                                                                                 | Mixed-methods design reported in title (page 1), and described in more detail in abstract (page 2)                                                      |
|                           |        | (b) Provide in the abstract an informative and balanced summary of what was done and what was found                                                                                                                                                                                                                                                                                                                                                                    | Page 2-3                                                                                                                                                |
| <b>Introduction</b>       |        |                                                                                                                                                                                                                                                                                                                                                                                                                                                                        |                                                                                                                                                         |
| Background/rationale      | 2      | Explain the scientific background and rationale for the investigation being reported                                                                                                                                                                                                                                                                                                                                                                                   | Page 3-5                                                                                                                                                |
| Objectives                | 3      | State specific objectives, including any pre-specified hypotheses                                                                                                                                                                                                                                                                                                                                                                                                      | Page 5                                                                                                                                                  |
| <b>Methods</b>            |        |                                                                                                                                                                                                                                                                                                                                                                                                                                                                        |                                                                                                                                                         |
| Study design              | 4      | Present key elements of study design early in the paper                                                                                                                                                                                                                                                                                                                                                                                                                | Described briefly in abstract (page 2), and in more detail in methods (page 5-8)                                                                        |
| Setting                   | 5      | Describe the setting, locations, and relevant dates, including periods of recruitment, exposure, follow-up, and data collection                                                                                                                                                                                                                                                                                                                                        | Separately reported for engagement work (page 5-6), qualitative component (page 7), and quantitative component (page 8)                                 |
| Participants              | 6      | (a) <i>Cohort study</i> —Give the eligibility criteria, and the sources and methods of selection of participants. Describe methods of follow-up<br><i>Case-control study</i> —Give the eligibility criteria, and the sources and methods of case ascertainment and control selection. Give the rationale for the choice of cases and controls<br><i>Cross-sectional study</i> —Give the eligibility criteria, and the sources and methods of selection of participants | Separately reported for engagement work (page 5-6), qualitative component (page 7), and quantitative component (page 8)                                 |
|                           |        | (b) <i>Cohort study</i> —For matched studies, give matching criteria and number of exposed and unexposed<br><i>Case-control study</i> —For matched studies, give matching criteria and the number of controls per case                                                                                                                                                                                                                                                 | Not applicable.<br>Quantitative component used intervention/control arms, but not matched; purposive sample and basis for comparison described (page 8) |
| Variables                 | 7      | Clearly define all outcomes, exposures, predictors, potential confounders, and effect modifiers. Give diagnostic criteria, if applicable                                                                                                                                                                                                                                                                                                                               | Described for quantitative component (page 15)                                                                                                          |
| Data sources/ measurement | 8*     | For each variable of interest, give sources of data and details of methods of assessment (measurement).                                                                                                                                                                                                                                                                                                                                                                | Described for quantitative                                                                                                                              |

|                        |     |                                                                                                                                                                                                                                                                                                           |                                                                                                                                                              |
|------------------------|-----|-----------------------------------------------------------------------------------------------------------------------------------------------------------------------------------------------------------------------------------------------------------------------------------------------------------|--------------------------------------------------------------------------------------------------------------------------------------------------------------|
|                        |     | Describe comparability of assessment methods if there is more than one group                                                                                                                                                                                                                              | component (page 8)                                                                                                                                           |
| Bias                   | 9   | Describe any efforts to address potential sources of bias                                                                                                                                                                                                                                                 | Acknowledged potential bias arising from quantitative component (page 14), however not possible to quantify and address in analysis                          |
| Study size             | 10  | Explain how the study size was arrived at                                                                                                                                                                                                                                                                 | Recruitment of participants/study size separately reported for engagement work (page 6), qualitative component (page 7), and quantitative component (page 8) |
| Quantitative variables | 11  | Explain how quantitative variables were handled in the analyses. If applicable, describe which groupings were chosen and why                                                                                                                                                                              | Reported for quantitative component (page 15)                                                                                                                |
| Statistical methods    | 12  | (a) Describe all statistical methods, including those used to control for confounding                                                                                                                                                                                                                     | Reported for quantitative component (page 15)                                                                                                                |
|                        |     | (b) Describe any methods used to examine subgroups and interactions                                                                                                                                                                                                                                       | Not applicable                                                                                                                                               |
|                        |     | (c) Explain how missing data were addressed                                                                                                                                                                                                                                                               | Not applicable                                                                                                                                               |
|                        |     | (d) <i>Cohort study</i> —If applicable, explain how loss to follow-up was addressed<br><i>Case-control study</i> —If applicable, explain how matching of cases and controls was addressed<br><i>Cross-sectional study</i> —If applicable, describe analytical methods taking account of sampling strategy | Not applicable                                                                                                                                               |
|                        |     | (e) Describe any sensitivity analyses                                                                                                                                                                                                                                                                     | Not applicable                                                                                                                                               |
| <b>Results</b>         |     |                                                                                                                                                                                                                                                                                                           |                                                                                                                                                              |
| Participants           | 13* | (a) Report numbers of individuals at each stage of study—eg numbers potentially eligible, examined for eligibility, confirmed eligible, included in the study, completing follow-up, and analysed                                                                                                         | Reported for quantitative component (page 15), including eligibility criteria (page 8)                                                                       |
|                        |     | (b) Give reasons for non-participation at each stage                                                                                                                                                                                                                                                      | Not applicable                                                                                                                                               |
|                        |     | (c) Consider use of a flow diagram                                                                                                                                                                                                                                                                        | Not applicable                                                                                                                                               |
| Descriptive data       | 14* | (a) Give characteristics of study participants (eg demographic, clinical, social) and information on exposures and potential confounders                                                                                                                                                                  | Not applicable                                                                                                                                               |
|                        |     | (b) Indicate number of participants with missing data for each variable of interest                                                                                                                                                                                                                       | Not applicable                                                                                                                                               |
|                        |     | (c) <i>Cohort study</i> —Summarise follow-up time (eg, average and total amount)                                                                                                                                                                                                                          | Reported duration of quantitative component follow-up period (page 8 and 15)                                                                                 |



|                          |     |                                                                                                                                                                                                              |                                                                                                                                                       |
|--------------------------|-----|--------------------------------------------------------------------------------------------------------------------------------------------------------------------------------------------------------------|-------------------------------------------------------------------------------------------------------------------------------------------------------|
| Outcome data             | 15* | <i>Cohort study</i> —Report numbers of outcome events or summary measures over time                                                                                                                          | Reported for quantitative component (page 15)                                                                                                         |
|                          |     | <i>Case-control study</i> —Report numbers in each exposure category, or summary measures of exposure                                                                                                         | Not applicable                                                                                                                                        |
|                          |     | <i>Cross-sectional study</i> —Report numbers of outcome events or summary measures                                                                                                                           | Not applicable                                                                                                                                        |
| Main results             | 16  | (a) Give unadjusted estimates and, if applicable, confounder-adjusted estimates and their precision (eg, 95% confidence interval). Make clear which confounders were adjusted for and why they were included | Quantitative analysis reported briefly in appendix (page 15). Adjusted odds ratios presented, with confidence intervals and confounding variables     |
|                          |     | (b) Report category boundaries when continuous variables were categorized                                                                                                                                    | Reported for quantitative component (page 15)                                                                                                         |
|                          |     | (c) If relevant, consider translating estimates of relative risk into absolute risk for a meaningful time period                                                                                             | Not applicable                                                                                                                                        |
| Other analyses           | 17  | Report other analyses done—eg analyses of subgroups and interactions, and sensitivity analyses                                                                                                               | Not applicable                                                                                                                                        |
| <b>Discussion</b>        |     |                                                                                                                                                                                                              |                                                                                                                                                       |
| Key results              | 18  | Summarise key results with reference to study objectives                                                                                                                                                     | Reported for all study components throughout discussion (page 11-14)                                                                                  |
| Limitations              | 19  | Discuss limitations of the study, taking into account sources of potential bias or imprecision. Discuss both direction and magnitude of any potential bias                                                   | Overall study limitations discussed (page 12), including specific acknowledgement of potential for bias arising from quantitative component (page 14) |
| Interpretation           | 20  | Give a cautious overall interpretation of results considering objectives, limitations, multiplicity of analyses, results from similar studies, and other relevant evidence                                   | Overall interpretation of results discussed (page 13-14)                                                                                              |
| Generalisability         | 21  | Discuss the generalisability (external validity) of the study results                                                                                                                                        | Statements on generalisability given (page 12, 14)                                                                                                    |
| <b>Other information</b> |     |                                                                                                                                                                                                              |                                                                                                                                                       |
| Funding                  | 22  | Give the source of funding and the role of the funders for the present study and, if applicable, for the original study on which the present article is based                                                | Page 16                                                                                                                                               |

\*Give information separately for cases and controls in case-control studies and, if applicable, for exposed and unexposed groups in cohort and cross-sectional studies.

**Note:** An Explanation and Elaboration article discusses each checklist item and gives methodological background and published examples of transparent reporting. The STROBE checklist is best used in conjunction with this article (freely available on the Web sites of PLoS Medicine at <http://www.plosmedicine.org/>, Annals of Internal Medicine at <http://www.annals.org/>, and Epidemiology at <http://www.epidem.com/>). Information on the STROBE Initiative is available at [www.strobe-statement.org](http://www.strobe-statement.org).

# BMJ Open

## Funding and policy incentives to encourage implementation of point-of-care C-reactive protein testing for lower respiratory tract infection in NHS primary care: a mixed-methods evaluation

|                                 |                                                                                                                                                                                                                                                                                                                                                                                                                                                                                                                                                                                                                                                        |
|---------------------------------|--------------------------------------------------------------------------------------------------------------------------------------------------------------------------------------------------------------------------------------------------------------------------------------------------------------------------------------------------------------------------------------------------------------------------------------------------------------------------------------------------------------------------------------------------------------------------------------------------------------------------------------------------------|
| Journal:                        | <i>BMJ Open</i>                                                                                                                                                                                                                                                                                                                                                                                                                                                                                                                                                                                                                                        |
| Manuscript ID                   | bmjopen-2018-024558.R1                                                                                                                                                                                                                                                                                                                                                                                                                                                                                                                                                                                                                                 |
| Article Type:                   | Research                                                                                                                                                                                                                                                                                                                                                                                                                                                                                                                                                                                                                                               |
| Date Submitted by the Author:   | 16-Jul-2018                                                                                                                                                                                                                                                                                                                                                                                                                                                                                                                                                                                                                                            |
| Complete List of Authors:       | Johnson, Matthew; Faculty of Health Sciences, University of Southampton, NIHR CLAHRC Wessex Data Science Hub<br>Cross, Liz; NIHR CLARHC East of England, Attenborough Surgery, Bushey Medical Centre, Herts Valleys Clinical Commissioning Group<br>Sandison, Nick; Faculty of Health Sciences, University of Southampton, NIHR CLAHRC Wessex<br>Stevenson, Jamie; Faculty of Health Sciences, University of Southampton, NIHR CLAHRC Wessex<br>Monks, T; Faculty of Health Sciences, University of Southampton, NIHR CLAHRC Wessex Data Science Hub<br>Moore, Michael; University of Southampton Medical School, Primary Care and Population Sciences |
| <b>Primary Subject Heading</b>: | General practice / Family practice                                                                                                                                                                                                                                                                                                                                                                                                                                                                                                                                                                                                                     |
| Secondary Subject Heading:      | Health policy                                                                                                                                                                                                                                                                                                                                                                                                                                                                                                                                                                                                                                          |
| Keywords:                       | Health policy < HEALTH SERVICES ADMINISTRATION & MANAGEMENT, PRIMARY CARE, Respiratory infections < THORACIC MEDICINE                                                                                                                                                                                                                                                                                                                                                                                                                                                                                                                                  |
|                                 |                                                                                                                                                                                                                                                                                                                                                                                                                                                                                                                                                                                                                                                        |

SCHOLARONE™  
Manuscripts

1  
2  
3 1 **Funding and policy incentives to encourage implementation of point-of-care**  
4 2 **C-reactive protein testing for lower respiratory tract infection in NHS primary**  
5 3 **care: a mixed-methods evaluation**  
6  
7  
8 4

9 5 **Matthew Johnson (corresponding author)**

10 6 mj1c13@soton.ac.uk

11 7 NIHR CLAHRC Wessex Data Science Hub, Faculty of Health Sciences, University of Southampton, UK  
12  
13  
14  
15 8

16 9 **Liz Cross**

17 10 liz.cross@nhs.net

18 11 NIHR CLARHC East of England, Attenborough Surgery, Bushey Medical Centre, Herts Valleys Clinical  
19 12 Commissioning Group, UK  
20  
21  
22  
23 13

24 14 **Nick Sandison**

25 15 N.J.Sandison@soton.ac.uk

26 16 NIHR CLAHRC Wessex, Faculty of Health Sciences, University of Southampton, UK  
27  
28  
29  
30 17

31 18 **Jamie Stevenson**

32 19 jamie.stevenson@soton.ac.uk

33 20 NIHR CLAHRC Wessex, Faculty of Health Sciences, University of Southampton, UK  
34  
35  
36  
37 21

38 22 **Thomas Monks**

39 23 thomas.monks@soton.ac.uk

40 24 NIHR CLAHRC Wessex Data Science Hub, Faculty of Health Sciences, University of Southampton, UK  
41  
42  
43  
44 25

45 26 **Michael Moore**

46 27 mvm198@soton.ac.uk

47 28 Head of Academic Unit, Primary Care and Population Sciences, University of Southampton  
48  
49  
50  
51 29

52 30

53 31

54 32

55 33

56 34

57 35

58 36

59 37

60 38

## 33 **Abstract**

34 **Objectives:** Utilisation of point-of-care C-reactive protein testing for lower respiratory tract infection  
35 has been limited in UK primary care, with costs and funding suggested as important barriers. We aimed  
36 to use existing National Health Service funding and policy mechanisms to alleviate these barriers, and  
37 engage with clinicians and healthcare commissioners to encourage implementation.

38 **Design:** A mixed-methods study design was adopted, including a qualitative survey to identify  
39 clinicians' and commissioners' perceived benefits, barriers and enablers post-implementation, and  
40 quantitative analysis of results from a real-world implementation study.

41 **Interventions:** We developed a funding specification to underpin local reimbursement of general  
42 practices for test delivery based on an item of service payment. We also created training and  
43 administrative materials to facilitate implementation by reducing organisational burden. The  
44 implementation study provided intervention sites with a testing device and supplies, training and  
45 practical assistance.

46 **Results:** Despite engagement with several groups, implementation and uptake of our funding  
47 specification were limited. Survey respondents confirmed costs and funding as important barriers in  
48 addition to physical and operational constraints, and cited training and the value of a local champion  
49 as enablers.

50 **Conclusions:** Although survey respondents highlighted the clinical benefits, funding remains a  
51 barrier to implementation in UK primary care, and appears not to be alleviated by the existing financial  
52 incentives available to commissioners. The potential to meet incentive targets using lower cost  
53 methods, a lack of policy consistency, or competing financial pressures and commissioning programmes  
54 may be important determinants of local priorities. An implementation champion could help to catalyse  
55 support and overcome operational barriers at the local level, but widespread implementation is likely  
56 to require national policy change. Successful implementation may reproduce antibiotic prescribing  
57 reductions observed in research studies.

1  
2  
3 584  
5 59 **Strengths and limitations of this study**

- 6  
7 60 • Use of a mixed-methods study design to assess the benefits, barriers and enablers of  
8  
9 61 implementation from multiple perspectives.
- 10  
11 62 • The study did not involve research funding for participating sites to enable evaluation of the  
12  
13 63 impact of real-world financial structures associated with NHS commissioning.
- 14  
15 64 • Development of a pack of resources that could contribute to future implementation projects.
- 16  
17 65 • The study was undertaken against a background of general financial constraint within the NHS,  
18  
19 66 which may have adversely impacted upon outcomes.

20  
21  
22 6723  
24 68 **Background**

25  
26 69 Acute uncomplicated lower respiratory tract infection (LRTI) is the one of the commonest acute illnesses  
27  
28 70 managed in primary care, and even in low antibiotic prescribing countries most patients receive  
29  
30 71 antibiotics<sup>1 2</sup>. There is a clear national and international agenda to reduce unnecessary antibiotic  
31  
32 72 prescribing<sup>3</sup>. The recently updated Cochrane review<sup>4</sup> of antibiotics for acute bronchitis demonstrated  
33  
34 73 modest benefits, with a reduction of cough duration of around half a day. These findings were not  
35  
36 74 replicated in a recently published large trial of antibiotics against placebo<sup>5</sup>. Limited benefit was  
37  
38 75 demonstrated from antibiotics likely to be balanced by harms, and no subgroup was identified in whom  
39  
40 76 there was a clinically relevant benefit<sup>5 6</sup>.

41  
42  
43 77 In the absence of clear benefit then what are the drivers of continued prescribing? Patients are  
44  
45 78 concerned about their symptoms<sup>7</sup>, and clinicians are worried about missing severe infection and to  
46  
47 79 avoid medico-legal consequences<sup>7-9</sup>. However, continued prescribing of antibiotics carries direct  
48  
49 80 prescribing costs, increased re-consultations<sup>10</sup> and the major threat of antibiotic resistance<sup>11</sup>. Moreover,  
50  
51 81 a large cohort study has shown that adverse events following primary care consultation with LRTI  
52  
53 82 patients are rare, and may not be directly influenced by prescribing strategy<sup>12</sup>.

1  
2  
3 83 There is evidence that antibiotic prescribing in LRTI may be limited by appropriate use of near patient  
4  
5 84 tests (NPT)<sup>13-15</sup>. Two candidates are available: C-reactive protein (CRP) and procalcitonin (PCT)<sup>16-18</sup>. An  
6  
7 85 individual patient data review and meta-analysis supported the use of PCT to guide antibiotic use in  
8  
9 86 acute settings including primary care, emergency units and intensive care, and demonstrated equivalent  
10  
11 87 clinical outcomes with reduced antibiotic uptake<sup>19</sup>. Similarly, a recent Cochrane review examining the  
12  
13 88 role of CRP in acute respiratory illness in primary care<sup>20</sup> included six trials with 3,284 participants and  
14  
15 89 demonstrated a reduction in antibiotic use, although the results were interpreted with caution due to a  
16  
17 90 high degree of heterogeneity. The recently published National Institute for Clinical Excellence (NICE)  
18  
19 91 pneumonia guidelines<sup>21</sup> have also endorsed the use of CRP to aid decision making in primary care,  
20  
21 92 selecting this ahead of PCT given the current non-availability of an NPT for PCT.

22  
23  
24 93 Several trials have explored the use of CRP in the primary care setting for management of LRTI, either  
25  
26 94 alone or in combination with a communications skills training package, and have demonstrated a  
27  
28 95 substantial reduction in antibiotic prescribing<sup>13-15</sup>. Although CRP is widely used in Scandinavian countries  
29  
30 96 uptake has been limited in the UK, despite evidence of effectiveness in trial contexts to direct rational  
31  
32 97 prescribing for LRTI. There is some question, however, of the effectiveness of CRP once adopted in  
33  
34 98 clinical practice; results of tests performed on those with upper respiratory tract infection were found to  
35  
36 99 have been misinterpreted, and modest effects on prescribing described<sup>22</sup>. Some have questioned  
37  
38 100 whether reduced antibiotic prescribing will be seen following implementation in low prescribing  
39  
40 101 settings<sup>23</sup>, while others have reported CRP being the main determinant of antibiotic prescription in  
41  
42 102 observational cohorts<sup>24</sup>.

43  
44  
45  
46 103 The reasons for the delayed uptake of NPT in the UK are not clear. Tests to reduce diagnostic  
47  
48 104 uncertainty were supported by primary care physicians in a multi-country study including the UK<sup>25</sup>.  
49  
50 105 Although studies suggest that CRP is a cost-effective means of addressing LRTI in primary care, there is  
51  
52 106 evidence that concerns around costs and funding remain a barrier to widespread implementation<sup>26</sup>. As  
53  
54 107 the UK National Health Service (NHS) model of primary care does not include item of service payments,  
55  
56  
57  
58  
59  
60

1  
2  
3 108 implementation of Point of Care testing (PoC) outside of a research setting would generate additional  
4  
5 109 work and costs for initial purchase, maintenance and consumables, whereas antibiotic prescriptions  
6  
7 110 have no direct cost at practice level (see **Appendix A** for further detail of primary care testing in the NHS  
8  
9 111 system). One plausible way to increase utilisation of CRP PoC would be the introduction of an item of  
10  
11 112 service payment for use of the test in management of LRTI. The NHS England General Medical Services  
12  
13 113 contract, in addition to defining the scope of standard primary care services to be delivered by general  
14  
15 114 practices, also includes provision for opt-in to the delivery of additional, 'locally enhanced' services  
16  
17 115 (LES)<sup>27</sup>. This study was based on the hypothesis that the LES scheme may provide a mechanism to  
18  
19 116 introduce a financial incentive to uptake of CRP PoC for the management of LRTI in an NHS primary  
20  
21 117 care setting.

22  
23  
24 118 We aimed to evaluate the efficacy of an item of service payment framework introduced at the local  
25  
26 119 level by way of the LES scheme as a means of encouraging implementation amongst clinicians and  
27  
28 120 healthcare commissioners. We also aimed to work with other groups and localities to explore  
29  
30 121 alternative approaches to implementation, and to identify the perceived benefits, barriers and  
31  
32 122 enablers using a post-implementation survey.

33  
34  
35  
36 123

## 37 124 **Methods**

### 38 125 **Leveraging funding and policy incentives**

39  
40  
41  
42 126 Our work has concentrated on making use of the opportunities afforded by existing NHS funding and  
43  
44 127 policy mechanisms to encourage implementation of CRP PoC in primary care. We did not provide any  
45  
46 128 research funding to participating organisations to ensure that successful implementation was not  
47  
48 129 artificial, and could potentially be reproduced by others in the context of the real-world financial  
49  
50 130 structures and constraints associated with healthcare commissioning in the NHS. All work in this  
51  
52 131 area was undertaken during 2015 and 2016.

1  
2  
3 132 We developed a standard LES specification to underpin local implementation, establishing a funding  
4  
5 133 framework of reimbursement of general practices by Clinical Commissioning Groups (CCGs) for CRP PoC  
6  
7 134 on a unit basis. In view of the importance given to budgetary concerns by commissioners considering  
8  
9 135 CRP implementation<sup>26</sup>, CCGs may be motivated by its potential to open access to national funding  
10  
11 136 associated with achieving the NHS England 'Quality Premium' (QP) target for reduced antibiotic  
12  
13 137 prescribing in primary care<sup>28</sup>.

14  
15  
16 138 Our research group, NIHR CLAHRC Wessex, is funded by both the National Institute for Health  
17  
18 139 Research (NIHR) and partner organisations (including CCGs) within the local health system. Partner  
19  
20 140 funding contributions may be monetary, or comprised of research study involvement. Our locality  
21  
22 141 covers nine CCGs, each of whom had the opportunity to fulfil this funding obligation by participating  
23  
24 142 in a CRP implementation study, or similar research. As well as this benefit, there was further  
25  
26 143 opportunity for any participation costs to be partially or fully offset if the QP was achieved as a  
27  
28 144 result.

### 31 145 **Engaging with the NHS**

32  
33  
34 146 Using materials from the GRACE Intro study<sup>15</sup> we developed resources including an online training  
35  
36 147 course for general practitioners on the use of CRP, a clinical audit form and patient information  
37  
38 148 leaflet<sup>29</sup>. All resources were made available to interested organisations as a means of facilitating  
39  
40 149 implementation by reducing the associated administrative burden.

41  
42  
43 150 We visited clinicians and healthcare commissioners in our locality to generate interest, and made  
44  
45 151 presentations at locality events to promote the LES framework. We also attended an NIHR CLARHC  
46  
47 152 Wessex showcase event to which local CCGs were invited. We followed up additional enquiries from  
48  
49 153 other groups outside of our locality who were interested in CRP implementation by offering visits  
50  
51 154 and presentations, and sharing the resources developed for our local study. Resources were shared  
52  
53 155 with ten groups across the country.



1  
2  
3 156 **Post-implementation survey**  
4

5  
6 157 In August 2017, following our period of NHS engagement, we issued an electronic survey to a  
7  
8 158 convenience sample of clinicians and commissioners who had expressed an interest in, or were known  
9  
10 159 to have contributed to, CRP implementation projects. Overall, nineteen individuals were invited to  
11  
12 160 participate, including healthcare commissioners, pharmacists, primary and secondary care clinicians,  
13  
14 161 and public health professionals.

15  
16  
17 162 We adopted a qualitative approach to explore in more depth the factors motivating respondents' initial  
18  
19 163 interest, their experience of the implementation process and perceived barriers and enablers. Survey  
20  
21 164 questions were written in line with these underlying objectives as deductively generated main themes<sup>30</sup>  
22  
23 165 **(box 1).**  
24  
25

26 We asked participants:

- 27 • What were your/your organisation's reasons for implementing CRP testing?
- 28 • What was your experience of implementing and using CRP testing, and what is happening now?
- 29 • Which aspects of the implementation worked well?
- 30 • What were the barriers to implementation and/or continued use?
- 31 • How did you overcome these barriers?
- 32 • What would have helped, or would help in the future to encourage continued use?
- 33 • What would facilitate the implementation process?
- 34 • What would be your recommendations for those looking to implement CRP testing in the future?

35 **Box 1: Post-implementation survey questions**  
36

37 166  
38 167 Following the method of thematic analysis described by Nowell and colleagues<sup>31</sup>, three members of the  
39  
40 168 research team (MJ, NS, TM) individually reviewed all survey responses to inductively identify more  
41  
42 169 specific subthemes. Reviewers took a systematic and iterative approach to analysis, later using  
43  
44 170 researcher triangulation to reach consensus.  
45  
46

47 171 **Implementation case study**  
48  
49

50 172 In parallel with our work to evaluate the use of an item of service payment framework as a means of  
51  
52 173 encouraging CRP implementation, a separate study was undertaken in Herts Valleys CCG to evaluate  
53  
54 174 CRP utilisation over three winter months (November 2016 – January 2017). This case study did not use  
55  
56 175 the LES framework, being separately funded by an NHS England Innovation Challenge Prize and driven  
57  
58  
59  
60

1  
2  
3 176 by a local champion. However, in view of the successful implementation in this locality we present  
4  
5 177 further detail in **Box 2** and results in **Appendix B** to demonstrate the potential effects of implementation  
6  
7 178 of CRP PoC on antibiotic prescribing.  
8  
9  
10

11  
12 Funded by an NHS England Innovation Challenge Prize, an implementation study was undertaken in Herts  
13 Valleys CCG to evaluate CRP utilisation over three winter months (November 2016 – January 2017) and in  
14 five general practices, purposively sampled using standardised practice-level prescribing data to target high  
15 and medium antibiotic prescribers. The study aimed to evaluate whether, compared to standard care, the  
16 availability of CRP PoC for LRTI in primary care was associated with reduced acute and follow-up antibiotic  
17 prescribing, and unscheduled primary care reattendances and healthcare contacts in the 28 days following  
18 presentation.

19  
20 Participating practices received an intervention consisting of one testing device and supplies to perform 100  
21 tests, training on the NICE guidelines and equipment use, a review visit and practical assistance from the  
22 study team where appropriate; all other costs were borne by the practice. Each practice was free to select  
23 an appropriate device location and means of operationalising patient flow based on the physical layout of  
24 the practice, available resources and staff skill mix.

25  
26 In line with the NICE guidelines, patients aged 18-65 presenting to intervention practices with suspected LRTI  
27 of less than three weeks' duration where there was diagnostic uncertainty were eligible to receive a test.  
28 Eligibility was assessed by the clinician during patient consultation. Patients with acute pneumonia,  
29 pregnant, immunocompromised, terminally ill or under follow up for Chronic Obstructive Pulmonary Disease  
30 were excluded<sup>21</sup>. As the offer was made on clinician discretion, and the patient entitled to refuse, some  
31 eligible patients did not receive a test. However, all eligible patients presenting to intervention practices  
32 were included in the evaluation, irrespective of whether they received a test.

33  
34 The five intervention practices were compared to three Herts Valleys CCG control practices of similar size  
35 and prescribing level, all of which continued to provide standard care. Control practices did not receive  
36 training. One member of the study team (LC) conducted a retrospective electronic search at control  
37 practices to identify new clinical consultations (during the same study period) with patients who met the  
38 CRP eligibility criteria. Presentations were identified using a set of Read codes<sup>32</sup> commonly used to record  
39 clinical activity related to LRTI in NHS primary care, and relevant information collected for analytical  
40 purposes.

41 Results from the implementation study are given in **Appendix B**.

42  
43 **Box 2: Herts Valleys CCG implementation study**

44 179

45 180

46  
47  
48 **181 Patient and public involvement**

49  
50  
51 182 There was no patient and public involvement (PPI) in development of the research question, although  
52  
53 183 implementation of CRP PoC flowed from the NICE pneumonia guidelines<sup>21</sup>, the development of which  
54  
55  
56  
57  
58  
59

1  
2  
3 184 involved substantial PPI input. There was no PPI in development of the LES specification. This would not  
4  
5 185 be normal practice in respect of a contractual arrangement for the funding of general practices.  
6  
7

8  
9 186

## 10 11 187 **Results**

### 12 13 188 **Adoption of the LES framework and implementation of CRP**

14  
15  
16 189 Whilst there was initial interest in CRP PoC facilitated by use of the LES framework, ultimately no  
17  
18 190 CCGs within the NIHR CLAHRC Wessex locality participated in implementation projects. CRP was  
19  
20 191 under consideration by one local CCG as part of a range of measures that might contribute to  
21  
22 192 achieving a 'Quality, Innovation, Productivity and Prevention' programme target around improving  
23  
24 193 detection of pneumonia in primary care, with the aim of enabling earlier intervention and reducing  
25  
26 194 hospital admissions. The CCG had planned to implement CRP across all of its general practices, but  
27  
28 195 concluded that the associated upfront capital cost was too substantial and did not proceed.  
29

30  
31 196 Another CCG outside of our locality was interested in more widespread CRP implementation based  
32  
33 197 on antibiotic prescribing reductions observed during a pilot undertaken in a single general practice.  
34  
35 198 Although ten testing devices were procured and were initially regularly used, declining utilisation in  
36  
37 199 the face of operational barriers prompted the CCG to cease procurement of PoC consumables.  
38  
39 200 Financial incentivisation by way of the LES framework was considered as a means of encouraging  
40  
41 201 utilisation, but ultimately failed to reengage interest.  
42  
43

44  
45 202 We are not aware of any other CCGs having adopted the LES framework, or having engaged in  
46  
47 203 implementation projects.  
48

### 49 204 **Post-implementation survey**

205 Of the nineteen individuals invited to participate, seven (37%) submitted full responses. Several  
 206 subthemes emerged from inductive analysis, with a high level of consistency amongst respondents  
 207 **(table 1)**.

208 All respondents reported being organisationally motivated by the potential for CRP PoC to help  
 209 reduce antibiotic prescribing, while some further specified a desire to reduce variation in prescribing  
 210 rates amongst practices in their locality. However, respondents also described mixed clinician  
 211 utilisation: while some regularly incorporated PoC into consultations for suspected LRTI, others did  
 212 not use it at all. Furthermore, one respondent noted that while utilisation had initially been high, it  
 213 had declined over time.

|                                                                                                                                                                                                                                                                                                                      |
|----------------------------------------------------------------------------------------------------------------------------------------------------------------------------------------------------------------------------------------------------------------------------------------------------------------------|
| <b>Benefits:</b>                                                                                                                                                                                                                                                                                                     |
| <ul style="list-style-type: none"> <li>• A clinical aid to appropriate antibiotic prescribing</li> <li>• An objective measure to improve patient confidence in the prescribing action</li> </ul>                                                                                                                     |
| <b>Barriers:</b>                                                                                                                                                                                                                                                                                                     |
| <ul style="list-style-type: none"> <li>• Limited time available during consultation</li> <li>• Layout of facility and placement of testing device</li> <li>• Cost of implementation and continued use</li> <li>• Source of funding</li> <li>• Resistance to change</li> <li>• Maintaining engagement</li> </ul>      |
| <b>Enablers:</b>                                                                                                                                                                                                                                                                                                     |
| <ul style="list-style-type: none"> <li>• Early adopters to share experience and provide mentorship</li> <li>• Training and education</li> <li>• Champions within practice/locality</li> <li>• Collaboration at local and national level</li> <li>• Better utilisation of IT to facilitate testing process</li> </ul> |
| <b>Table 1: Benefits, barriers and enablers of implementation</b>                                                                                                                                                                                                                                                    |

214

#### 215 **Benefits**

216 Most respondents agreed that CRP is a valuable clinical aid to appropriate antibiotic prescribing for  
 217 patients with symptoms of LRTI. Furthermore, some highlighted its value as an objective measure to  
 218 improve patient confidence in the chosen prescribing action, particularly in consultation with those  
 219 who are “very keen” to receive antibiotics. Two respondents noted that, in their experience, patients  
 220 had responded positively to the test and were satisfied with the outcome.

1  
2  
3 221 **Barriers**  
4

5 222 In general, respondents reported that interest amongst clinicians was sometimes poor, and  
6  
7 223 suggested a need for financial incentives and support to encourage widespread uptake. Most  
8  
9 224 mentioned cost pressures, while some questioned who should be responsible for funding: general  
10  
11 225 practices or the CCG. Despite the evidence base for the clinical benefits, one respondent suggested  
12  
13 226 that there remains a need to “clearly demonstrate short term benefits in costs, workload and safety”  
14  
15 227 to develop and maintain engagement.  
16  
17

18 228 Most respondents commented on the impact of operational constraints, such as the physical layout  
19  
20 229 of the practice, how to accommodate multiple users, and the time required to carry out the test,  
21  
22 230 particularly in the context of high workload and limited consultation duration. Although some  
23  
24 231 respondents argued that other benefits justified its use despite these barriers, others specifically  
25  
26 232 cited them as disincentives, especially for clinicians who may have a negative attitude to CRP or be  
27  
28 233 resistant to change.  
29  
30

31  
32 234 **Enablers**  
33

34  
35 235 Most respondents discussed the importance of collaboration, although interpretations of this  
36  
37 236 differed. Some suggested that early adopter sites share lessons learned to help others and avoid  
38  
39 237 duplicated effort. The value of training and education during the implementation process were  
40  
41 238 consistently emphasised, and development of a standard programme was suggested. Others  
42  
43 239 mentioned the role of NIHR in fostering collaborative working, and the potential for general practice  
44  
45 240 or CCG champions to improve engagement and resolve problems. Some respondents also suggested  
46  
47 241 better use of IT to facilitate testing. Specific examples included the deployment of standard  
48  
49 242 templates to record the test and result in the practice management system, and use of electronic  
50  
51 243 alerts during consultation to prompt clinicians to PoC if indicated.  
52  
53

54 244  
55  
56  
57  
58  
59  
60

## 245 **Discussion**

### 246 **Summary of main findings**

247 Despite initial interest, there was no implementation in the NIHR CLAHRC Wessex locality, and no  
248 CCGs formally adopted the LES framework. The research team were unable to gain significant  
249 traction with CCG management, and when contact was established CCGs were unwilling to prioritise  
250 antibiotic stewardship over other local initiatives. The policy levers seemed to have little impact in  
251 this locality, where CCGs were struggling to remain in budget. The financial rewards arising from the  
252 QP only applied to CCGs meeting financial targets. Elsewhere, one CCG implemented CRP and,  
253 following declining utilisation in response to operational barriers, found that the LES framework was  
254 insufficient as a mechanism to reengage interest.

255 Although the small sample size limits inference and generalisability, our post-implementation survey  
256 identified several financial, operational and physical barriers in common with previous qualitative  
257 research<sup>26</sup>. Respondents confirmed that implementation would be unlikely without financial  
258 incentives but also highlighted difficulties integrating PoC into practice workflow, and constraints  
259 arising from a lack of dedicated space, equipment sharing and limited time. Reported enablers  
260 included adequate training and the value of a local champion.

261 Some respondents also emphasised the clinical benefits of CRP, giving anecdotal examples of cases  
262 where testing had prevented antibiotic prescription. The potential for more widespread repetition of  
263 this outcome is suggested by quantitative results from the Herts Valley CCG implementation study,  
264 where a successful, separately funded implementation scheme was run for a three month period,  
265 driven by a local champion. Observation of substantial prescribing reductions amongst intervention  
266 practices suggests that implementation in the NHS might replicate the prescribing reductions  
267 reported in research studies.

### 268 **Comparison with other literature**

1  
2  
3 269 We are unaware of any other implementation studies concerning CRP PoC in the UK. In other health  
4  
5 270 settings PoC is widely adopted<sup>22</sup>, and following government directives has been introduced in the  
6  
7 271 Netherlands<sup>33</sup>. The financial barriers to implementation have been identified in a previous study  
8  
9 272 including European and UK participants<sup>23</sup>, which noted that countries with high rates of use had  
10  
11 273 alternative reimbursement models, and that widespread implementation in Europe followed health  
12  
13 274 policy change. The same study also highlighted issues around workflow and time as potential  
14  
15 275 barriers to implementation in the UK.

### 18 276 **Strengths and weaknesses**

21 277 Our study describes the results of attempts at CRP implementation without the resources associated  
22  
23 278 with research, and without specific policy directives. It is unclear how generalisable our findings  
24  
25 279 might be; it would appear that CCG partnership with NIHR CLAHRC Wessex and national level  
26  
27 280 incentives via the QP should have maximised the potential for local implementation. The scheme  
28  
29 281 was devised during a time of general financial constraint within the NHS, which may have had  
30  
31 282 particular impact in the Wessex locality.

### 34 283 **Limitations around funding mechanisms**

37 284 The criteria required to achieve the QP, even taking the antibiotic prescribing element alone, has  
38  
39 285 been inconsistent. Some changes have been significant, such as a move to greater emphasis on  
40  
41 286 antibiotic prescribing for urinary tract infection as of 2018/19<sup>28</sup>. Furthermore, as the QP is awarded  
42  
43 287 retrospectively and is contingent upon meeting other financial targets, the funding mechanism is not  
44  
45 288 guaranteed, making it difficult to engage commissioners and to create a firm financial framework to  
46  
47 289 underpin CRP implementation.

50 290 A further feature of the QP is that no method of achievement is stipulated; the antibiotic prescribing  
51  
52 291 element simply requires an absolute prescribing reduction. The NHS has reported a national ~7%  
53  
54 292 reduction in primary care coinciding with the implementation phase of this study<sup>34-36</sup>, which may

1  
2  
3 293 have resulted from a general policy shift and increased focus of clinical training in primary care. This  
4  
5 294 suggests that overall improvements could be gained and the QP target potentially achieved by way  
6  
7 295 of alternative, lower cost methods alone, negating commissioners' financial incentive for CRP  
8  
9 296 implementation irrespective of the clinical benefits.

10  
11  
12 297 The pressures of multiple, competing commissioning programmes may limit engagement with  
13  
14 298 certain initiatives, while the overall funding structure of the NHS may also influence commissioners'  
15  
16 299 preferences and priorities. One CCG within our locality suggested that, despite evidence of a net cost  
17  
18 300 saving associated with CRP<sup>37</sup>, whilst the upfront implementation costs reside with primary care, any  
19  
20 301 savings would principally be realised by the secondary care sector. In this instance, therefore,  
21  
22 302 concerns that the costs and benefits of the initiative may be distinctly localised within separate areas  
23  
24 303 of the health system acted as a disincentive to its adoption.

#### 25 26 27 304 **Implications**

28  
29  
30 305 Whilst the use of existing financial structures appeared appealing as a mechanism, it was not  
31  
32 306 possible to fully test the hypothesis that modest financial incentives to general practices at local  
33  
34 307 level would enable CRP implementation, as financial pressures impeded CCG adoption of the policy.  
35  
36 308 National incentives for CCGs did not appear to override the financial constraints because a) financial  
37  
38 309 rewards were only available to CCGs meeting financial targets, and b) antibiotic targets were being  
39  
40 310 achieved through other mechanisms not requiring financial investment.

41  
42  
43 311 Although a small case study suggests that implementation outside of research studies may result in  
44  
45 312 similar prescribing reductions, since it was driven by local investment and a local champion it may  
46  
47 313 not fully reflect implementation in routine practice, or be generalisable to other areas. Furthermore,  
48  
49 314 and recalling questions over the primacy of lower cost measures, the fact that this intervention  
50  
51 315 provided training and support in addition to testing materials limits the extent to which the  
52  
53 316 observed prescribing reductions can be confidently attributed to CRP PoC alone.



1  
2  
3 317 The value of an enthusiastic, local champion to catalyse support for implementation emerged from  
4  
5 318 both the qualitative and quantitative strands of this study. Knowledge mobilisation and  
6  
7 319 implementation in practice may be assisted by way of a Researcher-In-Residence model<sup>38</sup>, while  
8  
9 320 further qualitative and observational research could improve understanding of how champions are  
10  
11 321 able to persuade and engage clinicians and to encourage commissioners to look beyond the  
12  
13 322 immediate financial disincentives, and whether they may be effective in other areas and settings.  
14  
15 323 Further economic research might also model different modes of implementation to assess the costs  
16  
17 324 and consequences across the system, and to find alternative funding models to overcome the  
18  
19 325 financial barriers. Multi-purpose testing devices, for example, may have the advantage of spreading  
20  
21 326 investment across several funding streams.

22  
23  
24 327 In conclusion, it seems unlikely that financial schemes falling outside of national policy will gain  
25  
26 328 much traction in a financially constrained NHS. Full-scale implementation of CRP PoC is likely to  
27  
28 329 require central implementation via government policy or contractual changes.  
29  
30

31 330

### 331 **List of abbreviations**

332 LRTI: Lower respiratory tract infection; NPT: Near patient test; CRP: C-reactive protein; PCT:  
333 Procalcitonin; NICE: National Institute for Clinical Excellence; NHS: National Health Service; PoC:  
334 Point of care testing; LES: Locally Enhanced Service; CCG: Clinical Commissioning Group; QP: NHS  
335 England Quality Premium; NIHR: National Institute for Health Research; PPI: Patient and public  
336 involvement

337

### 338 **Declarations**

#### 339 **Ethical approval**

340 The Integrated Research Application System (IRAS) confirmed that formal ethical approval was not  
341 required for the Herts Valleys CCG implementation study; a service evaluation project.

1  
2  
3 342 **Funding statement**

4 343 This research was funded by the National Institute for Health Research (NIHR) Collaboration for  
5  
6 344 Leadership in Applied Health Research and Care Wessex at University Hospital Southampton NHS  
7  
8 345 Foundation Trust. The views expressed are those of the author(s) and not necessarily those of the  
9  
10 346 NHS, the NIHR or the Department of Health and Social Care.

11  
12  
13 347 The Herts Valleys CCG implementation study was separately supported by a 2015/16 NHS England  
14  
15 348 Innovation Challenge Prize, Acorn award.

16  
17  
18 349 **Competing interests**

19  
20 350 MJ, NS, JS, TM and MM have no competing interests to declare. LC has received honoraria from  
21  
22 351 Abbott Laboratories and Roche Diagnostics Ltd for speaking events.

23  
24  
25 352 **Authors' contributions**

26  
27 353 MJ carried out quantitative analysis and wrote the paper with contributions from MM. MJ and NS  
28  
29 354 developed the post-implementation survey and, with TM, carried out qualitative analysis. LC carried  
30  
31 355 out the Herts Valleys CCG implementation study. JS, NS and MM developed the LES framework and  
32  
33 356 other resources, and engaged with the NHS. TM provided methodological input and MM provided  
34  
35 357 clinical guidance. All authors commented on drafts of the paper and have read and approved the  
36  
37 358 final manuscript.

38  
39  
40 359 **Patient consent for publication**

41  
42 360 Not applicable.

43  
44  
45 361 **Data sharing statement**

46  
47 362 No additional data available.

48 363 **Acknowledgements**

49  
50 364 The authors thank Elsie Griffins and Dr Denise Knight for their support for the Herts Valleys CCG  
51  
52 365 implementation study.

53  
54  
55 366

367 **References**

- 368 1. Butler CC, Hood K, Verheij T, et al. Variation in antibiotic prescribing and its impact on recovery in  
369 patients with acute cough in primary care: prospective study in 13 countries. *BMJ*  
370 2009;338(b2242)
- 371 2. Akkerman AE, van der Wouden JC, Kuyvenhoven MM, et al. Antibiotic prescribing for respiratory  
372 tract infections in Dutch primary care in relation to patient age and clinical entities. *J*  
373 *Antimicrob Chemother* 2004;54(6):1116-21. doi: 10.1093/jac/dkh480 [published Online First:  
374 2004/11/18]
- 375 3. Davies SC. Annual Report of the Chief Medical Officer, Volume Two, 2011, Infections and the rise  
376 of antimicrobial resistance. London: Department of Health 2013.
- 377 4. Smith SM, Fahey T, Smucny J, et al. Antibiotics for acute bronchitis. *Cochrane Database Syst Rev*  
378 2014(3):CD000245. doi: 10.1002/14651858.CD000245.pub3 [published Online First:  
379 2014/03/04]
- 380 5. Little P, Stuart B, Moore M, et al. Amoxicillin for acute lower-respiratory-tract infection in primary  
381 care when pneumonia is not suspected: a 12-country, randomised, placebo-controlled trial.  
382 *The Lancet Infectious Diseases* 2013;13(2):123-29. doi: 10.1016/s1473-3099(12)70300-6
- 383 6. Moore M, Stuart B, Coenen S, et al. Amoxicillin for acute lower respiratory tract infection in  
384 primary care: subgroup analysis of potential high-risk groups. *Br J Gen Pract*  
385 2014;64(619):e75-80. doi: 10.3399/bjgp14X677121 [published Online First: 2014/02/26]
- 386 7. Cornford CS. Why patients consult when they cough: a comparison of consulting and non-  
387 consulting patients. *British Journal of General Practice* 1998;48(436):1751-4.
- 388 8. Little P, Watson L, Morgan S, et al. Antibiotic prescribing and admissions with major suppurative  
389 complications of respiratory tract infections: a data linkage study. *British Journal of General*  
390 *Practice* 2002;52:187-93.9. Winchester CC, Macfarlane TV, Thomas M, et al. Antibiotic  
391 prescribing and outcomes of lower respiratory tract infection in UK primary care. *Chest*  
392 2009;135(5):1163-72. doi: 10.1378/chest.07-2940 [published Online First: 2009/05/08]
- 393 10. Moore M, Little P, Rumsby K, et al. Effect of antibiotic prescribing strategies and an information  
394 leaflet on longer-term reconsultation for acute lower respiratory tract infection. *Br J Gen*  
395 *Pract* 2009;59(567):728-34. doi: 10.3399/bjgp09X472601 [published Online First:  
396 2009/10/22]
- 397 11. Goossens H, Ferech M, Vander Stichele R, et al. Outpatient antibiotic use in Europe and  
398 association with resistance: a cross-national database study. *The Lancet*  
399 2005;365(9459):579-87. doi: 10.1016/s0140-6736(05)70799-6
- 400 12. Little P, Stuart B, Smith S, et al. Antibiotic prescription strategies and adverse outcome for  
401 uncomplicated lower respiratory tract infections: prospective cough complication cohort  
402 (3C) study. *BMJ* 2017;357:j2148. doi: 10.1136/bmj.j2148 [published Online First:  
403 2017/05/24]
- 404 13. Cals JW, Butler CC, Hopstaken RM, et al. Effect of point of care testing for C reactive protein and  
405 training in communication skills on antibiotic use in lower respiratory tract infections: cluster  
406 randomised trial. *BMJ* 2009;338:b1374. doi: 10.1136/bmj.b1374 [published Online First:  
407 2009/05/07]
- 408 14. Cals JW, Schot MJ, de Jong SA, et al. Point-of-care C-reactive protein testing and antibiotic  
409 prescribing for respiratory tract infections: a randomized controlled trial. *Ann Fam Med*  
410 2010;8(2):124-33. doi: 10.1370/afm.1090 [published Online First: 2010/03/10]
- 411 15. Little P, Stuart B, Francis N, et al. Effects of internet-based training on antibiotic prescribing rates  
412 for acute respiratory-tract infections: a multinational, cluster, randomised, factorial,  
413 controlled trial. *The Lancet* 2013;382(9899):1175-82. doi: 10.1016/s0140-6736(13)60994-0
- 414 16. Briel M, Schuetz P, Mueller B, et al. Procalcitonin-Guided Antibiotic Use vs a Standard Approach  
415 for Acute Respiratory Tract Infections in Primary Care. *Arch Intern Med* 2008;168(18):2000-  
416 07.

- 1  
2  
3 417 17. Holm A, Pedersen SS, Nexoe J, et al. Procalcitonin versus C-reactive protein for predicting  
4 418 pneumonia in adults with lower respiratory tract infection in primary care. *British Journal of*  
5 419 *General Practice* 2007;57:555-60.
- 6 420 18. Christ-Crain M, Opal SM. Clinical review: The role of biomarkers in the diagnosis and  
7 421 management of community acquired pneumonia. *Critical Care* 2010;14(203) doi:  
8 422 10.1186/cc8155
- 9 423 19. Schuetz P, Briel M, Christ-Crain M, et al. Procalcitonin to guide initiation and duration of  
10 424 antibiotic treatment in acute respiratory infections: an individual patient data meta-analysis.  
11 425 *Clin Infect Dis* 2012;55(5):651-62. doi: 10.1093/cid/cis464 [published Online First:  
12 426 2012/05/11]
- 13 427 20. Aabenhus R, Jensen JU, Jorgensen KJ, et al. Biomarkers as point-of-care tests to guide  
14 428 prescription of antibiotics in patients with acute respiratory infections in primary care.  
15 429 *Cochrane Database Syst Rev* 2014(11):CD010130. doi: 10.1002/14651858.CD010130.pub2  
16 430 [published Online First: 2014/11/07]
- 17 431 21. National Institute for Health and Care Excellence. Pneumonia in adults: diagnosis and  
18 432 management (CG191) 2014 [Available from: <https://www.nice.org.uk/guidance/cg191>  
19 433 accessed 13 March 2018.
- 20 434 22. André M, Schwan A, Odenholt I. The Use of CRP Tests in Patients with Respiratory Tract  
21 435 Infections in Primary Care in Sweden Can Be Questioned. *Scandinavian Journal of Infectious*  
22 436 *Diseases* 2009;36(3):192-97. doi: 10.1080/00365540410019372
- 23 437 23. Minnaard MC, van de Pol AC, Hopstaken RM, et al. C-reactive protein point-of-care testing and  
24 438 associated antibiotic prescribing. *Fam Pract* 2016;33(4):408-13. doi:  
25 439 10.1093/fampra/cmw039 [published Online First: 2016/05/28]
- 26 440 24. Jakobsen KA, Melbye H, Kelly MJ, et al. Influence of CRP testing and clinical findings on antibiotic  
27 441 prescribing in adults presenting with acute cough in primary care. *Scand J Prim Health Care*  
28 442 2010;28(4):229-36. doi: 10.3109/02813432.2010.506995 [published Online First:  
29 443 2010/08/14]
- 30 444 25. Tonkin-Crine S, Yardley L, Coenen S, et al. GPs' views in five European countries of interventions  
31 445 to promote prudent antibiotic use. *Br J Gen Pract* 2011;61(586):e252-61. doi:  
32 446 10.3399/bjgp11X572445 [published Online First: 2011/05/31]
- 33 447 26. Huddy JR, Ni MZ, Barlow J, et al. Point-of-care C reactive protein for the diagnosis of lower  
34 448 respiratory tract infection in NHS primary care: a qualitative study of barriers and facilitators  
35 449 to adoption. *BMJ Open* 2016;6(3):e009959. doi: 10.1136/bmjopen-2015-009959 [published  
36 450 Online First: 2016/03/05]
- 37 451 27. NHS England. NHS England Standard General Medical Services Contract 2017/18 2018 [Available  
38 452 from: <https://www.england.nhs.uk/gp/gpfp/investment/gp-contract/> accessed 13 March  
39 453 2018.
- 40 454 28. NHS England. Quality Premium 2018 [Available from:  
41 455 <https://www.england.nhs.uk/resources/resources-for-ccgs/ccg-out-tool/ccg-ois/qual-prem/>  
42 456 accessed 16 May 2018.
- 43 457 29. NIHR CLAHRC Wessex. Reducing unnecessary antibiotic prescribing in primary care 2018  
44 458 [Available from: <https://www.clahrc-wessex.nihr.ac.uk/theme/project/20> accessed 24th  
45 459 May 2018.
- 46 460 30. Braun V, Clarke V. Using thematic analysis in psychology. *Qualitative Research in Psychology*  
47 461 2006;3(2):77-101. doi: 10.1191/1478088706qp063oa
- 48 462 31. Nowell LS, Norris JM, White DE, et al. Thematic Analysis: Striving to Meet the Trustworthiness  
49 463 Criteria. *International Journal of Qualitative Methods* 2017;16:1-13. doi:  
50 464 10.1177/1609406917733847
- 51 465 32. Benson T. The history of the Read codes: the inaugural James Read Memorial Lecture 2011.  
52 466 *Journal of Innovation in Health Informatics* 2011;19(3):173-82. doi: 10.14236/jhi.v19i3.811

- 1  
2  
3 467 33. The Dutch College of General Practitioners (NHG). NHG-Standaard Acute hoesten (Acute cough  
4 468 guidelines) 2018 [Available from: [https://www.nhg.org/standaarden/volledig/nhg-](https://www.nhg.org/standaarden/volledig/nhg-standaard-acuut-hoesten)  
5 469 [standaard-acuut-hoesten](https://www.nhg.org/standaarden/volledig/nhg-standaard-acuut-hoesten) accessed 31st May 2018.  
6 470 34. NHS England. Success in NHS push to reduce avoidable antibiotic prescribing 2016 [Available  
7 471 from: <https://www.england.nhs.uk/2016/03/antibiotic-prescribing/> accessed 17 May 2018.  
8 472 35. NHS England. Antibiotic quality premium monitoring dashboard 2018 [Available from:  
9 473 <https://www.england.nhs.uk/resources/resources-for-ccgs/ccg-out-tool/ccg-ois/anti-dash/>  
10 474 accessed 17 May 2018.  
11 475 36. NHS Improvement. Helping GPs to cut antibiotic prescriptions by 2.6m in just one year 2016  
12 476 [Available from: [https://improvement.nhs.uk/news-alerts/helping-gps-cut-antibiotic-](https://improvement.nhs.uk/news-alerts/helping-gps-cut-antibiotic-prescriptions/)  
13 477 [prescriptions/](https://improvement.nhs.uk/news-alerts/helping-gps-cut-antibiotic-prescriptions/) accessed 17 May 2018.  
14 478 37. Hunter R. Cost-effectiveness of point-of-care C-reactive protein tests for respiratory tract  
15 479 infection in primary care in England. *Adv Ther* 2015;32(1):69-85. doi: 10.1007/s12325-015-  
16 480 0180-x [published Online First: 2015/01/27]  
17 481 38. Marshall M, Pagel C, French C, et al. Moving improvement research closer to practice: the  
18 482 Researcher-in-Residence model. *BMJ Qual Saf* 2014;23(10):801-5. doi: 10.1136/bmjqs-2013-  
19 483 002779 [published Online First: 2014/06/05]

21 484

22 485

peer review only

## Appendix A: Primary care testing in the NHS health system

In the UK healthcare is free at the point of contact and funded through central taxation. There is no co-payment or health insurance needed for patients to access the NHS. General practices rarely perform tests on the primary care site, with few exceptions such as urine dip tests, pregnancy tests and sometimes coagulation monitoring. The majority of laboratory tests are organised by the local hospital, with patients either attending the hospital directly for sampling, or samples being taken at the general practice and sent to the laboratory. Payment for the test is by way of a 'block contract' arrangement, and paid for by the CCG so that neither the patient nor the practice bear any cost. Under the current contractual arrangement the general practice is unable to charge the patient for NPTs and so, if performed, bears the full cost from its own income, as well as an additional time burden. For these reasons NPTs such as CRP are unfamiliar to practitioners in the UK, necessitating an examination of alternative means to encourage their implementation.

## Appendix B: Results from Herts Valleys CCG implementation study

Five intervention practices with a total list size of 63,743 patients recorded 682 eligible LRTI presentations during the study period, of which 176 (26%) involved a CRP test. Three control practices recorded 258 presentations (based on the same eligibility criteria) from 35,928 patients.

The conversion of initial LRTI presentations to CRP tests (intervention arm only) and to other primary care healthcare events (both study arms) were reported descriptively. A binary outcome variable was created to represent antibiotic prescription during the 28 days following the initial LRTI presentation.

As delayed prescribing was relatively infrequent at both intervention and control practices acute and delayed prescriptions were combined into a single outcome. Multivariate logistic regression was then used to estimate the odds of antibiotic prescription and follow-up consultation following initial presentation to practices in the intervention and control arms, adjusting for age (modelled as a binary variable with categories ' $< 44$ ' and ' $\geq 45$ ') and sex. Model fit was assessed using the likelihood ratio test, which indicated that patient sex was not a statistically significant predictor of either outcome. Adjusted odds ratios from the final models were reported, along with 95% confidence intervals and p-values to assess significance.

Overall, fewer initial presentations to intervention practices resulted in antibiotic prescription (59% of initial presentations, as compared to 79%) and follow-up consultations (30% compared to 38%), although there was little difference to antibiotic prescribing at follow-up (both arms 68%) (**table 2**). Furthermore, initial presentations with antibiotic prescription then resulting in follow-up consultation with an additional prescription were more common amongst control practices (21% compared to 13%).

|                                                                                                                               | Intervention arm (n = 682) |                 | Control arm (n = 258) |                 |
|-------------------------------------------------------------------------------------------------------------------------------|----------------------------|-----------------|-----------------------|-----------------|
|                                                                                                                               | Outcome events             | %               | Outcome events        | %               |
| <b>CRP test at initial presentation</b>                                                                                       | 176                        | 26              | -                     | -               |
| <b>Antibiotic prescription at initial presentation</b>                                                                        | 405                        | 59              | 204                   | 79              |
| <b>Follow-up consultation after initial presentation</b>                                                                      | 206                        | 30              | 99                    | 38              |
| <b>Antibiotic prescription at follow-up consultation</b>                                                                      | 140                        | 68 <sup>a</sup> | 67                    | 68 <sup>a</sup> |
| <b>Initial presentation with antibiotic prescription, then follow-up consultation with additional antibiotic prescription</b> | 92                         | 13              | 55                    | 21              |

**Table 2: Primary care healthcare events resulting from initial LRTI presentation**  
*All percentages compared to number of initial presentations, except (ª) compared to number of follow up consultations*

We found that the odds of antibiotic prescribing after initial presentation were reduced by 62% amongst intervention practices, and the odds of follow up consultation were reduced by 32% (table 3). In each case we found that the outcome was more likely amongst presenting patients in the older age category.

| Outcome                                                   | Variable           | Adjusted OR (95% CI) | p-value |
|-----------------------------------------------------------|--------------------|----------------------|---------|
| <b>Antibiotic prescription after initial presentation</b> | <b>Study arm</b>   |                      |         |
|                                                           | Control            | <i>Reference</i>     |         |
|                                                           | Intervention       | 0.38 (0.27, 0.53)    | < 0.001 |
|                                                           | <b>Patient age</b> |                      |         |
| < 44                                                      | <i>Reference</i>   |                      |         |
| ≥ 45                                                      | 1.35 (1.02, 1.77)  | 0.035                |         |
| <b>Follow-up consultation after initial presentation</b>  | <b>Study arm</b>   |                      |         |
|                                                           | Control            | <i>Reference</i>     |         |
|                                                           | Intervention       | 0.68 (0.51, 0.92)    | 0.013   |
|                                                           | <b>Patient age</b> |                      |         |
| < 44                                                      | <i>Reference</i>   |                      |         |
| ≥ 45                                                      | 1.40 (1.06, 1.85)  | 0.019                |         |

**Table 3: Multivariate logistic regression models for the association of practice-level intervention with antibiotic prescribing after initial presentation and follow-up consultation after initial presentation**



**STROBE 2007 (v4) checklist of items to be included in reports of observational studies in epidemiology\***  
**Checklist for cohort, case-control, and cross-sectional studies (combined)**

| Section/Topic             | Item # | Recommendation                                                                                                                                                                                                                                                                                                                                                                                                                                                         | Reported on page #                                                                                                                                      |
|---------------------------|--------|------------------------------------------------------------------------------------------------------------------------------------------------------------------------------------------------------------------------------------------------------------------------------------------------------------------------------------------------------------------------------------------------------------------------------------------------------------------------|---------------------------------------------------------------------------------------------------------------------------------------------------------|
| Title and abstract        | 1      | (a) Indicate the study’s design with a commonly used term in the title or the abstract                                                                                                                                                                                                                                                                                                                                                                                 | Mixed-methods design reported in title (page 1), and described in more detail in abstract (page 2)                                                      |
|                           |        | (b) Provide in the abstract an informative and balanced summary of what was done and what was found                                                                                                                                                                                                                                                                                                                                                                    | Page 2                                                                                                                                                  |
| <b>Introduction</b>       |        |                                                                                                                                                                                                                                                                                                                                                                                                                                                                        |                                                                                                                                                         |
| Background/rationale      | 2      | Explain the scientific background and rationale for the investigation being reported                                                                                                                                                                                                                                                                                                                                                                                   | Page 3-5                                                                                                                                                |
| Objectives                | 3      | State specific objectives, including any pre-specified hypotheses                                                                                                                                                                                                                                                                                                                                                                                                      | Page 5                                                                                                                                                  |
| <b>Methods</b>            |        |                                                                                                                                                                                                                                                                                                                                                                                                                                                                        |                                                                                                                                                         |
| Study design              | 4      | Present key elements of study design early in the paper                                                                                                                                                                                                                                                                                                                                                                                                                | Described briefly in abstract (page 2), and in more detail in methods (page 5-8)                                                                        |
| Setting                   | 5      | Describe the setting, locations, and relevant dates, including periods of recruitment, exposure, follow-up, and data collection                                                                                                                                                                                                                                                                                                                                        | Separately reported for engagement work (page 5-6), qualitative component (page 7), and quantitative component (page 8)                                 |
| Participants              | 6      | (a) <i>Cohort study</i> —Give the eligibility criteria, and the sources and methods of selection of participants. Describe methods of follow-up<br><i>Case-control study</i> —Give the eligibility criteria, and the sources and methods of case ascertainment and control selection. Give the rationale for the choice of cases and controls<br><i>Cross-sectional study</i> —Give the eligibility criteria, and the sources and methods of selection of participants | Separately reported for engagement work (page 5-6), qualitative component (page 7), and quantitative component (page 8)                                 |
|                           |        | (b) <i>Cohort study</i> —For matched studies, give matching criteria and number of exposed and unexposed<br><i>Case-control study</i> —For matched studies, give matching criteria and the number of controls per case                                                                                                                                                                                                                                                 | Not applicable.<br>Quantitative component used intervention/control arms, but not matched; purposive sample and basis for comparison described (page 8) |
| Variables                 | 7      | Clearly define all outcomes, exposures, predictors, potential confounders, and effect modifiers. Give diagnostic criteria, if applicable                                                                                                                                                                                                                                                                                                                               | Described for quantitative component (Appendix B)                                                                                                       |
| Data sources/ measurement | 8*     | For each variable of interest, give sources of data and details of methods of assessment (measurement).                                                                                                                                                                                                                                                                                                                                                                | Described for quantitative                                                                                                                              |

|                        |     |                                                                                                                                                                                                                                                                                                           |                                                                                                                                                              |
|------------------------|-----|-----------------------------------------------------------------------------------------------------------------------------------------------------------------------------------------------------------------------------------------------------------------------------------------------------------|--------------------------------------------------------------------------------------------------------------------------------------------------------------|
|                        |     | Describe comparability of assessment methods if there is more than one group                                                                                                                                                                                                                              | component (page 8)                                                                                                                                           |
| Bias                   | 9   | Describe any efforts to address potential sources of bias                                                                                                                                                                                                                                                 | Acknowledged potential bias arising from quantitative component (page 14), however not possible to quantify and address in analysis                          |
| Study size             | 10  | Explain how the study size was arrived at                                                                                                                                                                                                                                                                 | Recruitment of participants/study size separately reported for engagement work (page 6), qualitative component (page 7), and quantitative component (page 8) |
| Quantitative variables | 11  | Explain how quantitative variables were handled in the analyses. If applicable, describe which groupings were chosen and why                                                                                                                                                                              | Reported for quantitative component (Appendix B)                                                                                                             |
| Statistical methods    | 12  | (a) Describe all statistical methods, including those used to control for confounding                                                                                                                                                                                                                     | Reported for quantitative component (Appendix B)                                                                                                             |
|                        |     | (b) Describe any methods used to examine subgroups and interactions                                                                                                                                                                                                                                       | Not applicable                                                                                                                                               |
|                        |     | (c) Explain how missing data were addressed                                                                                                                                                                                                                                                               | Not applicable                                                                                                                                               |
|                        |     | (d) <i>Cohort study</i> —If applicable, explain how loss to follow-up was addressed<br><i>Case-control study</i> —If applicable, explain how matching of cases and controls was addressed<br><i>Cross-sectional study</i> —If applicable, describe analytical methods taking account of sampling strategy | Not applicable                                                                                                                                               |
|                        |     | (e) Describe any sensitivity analyses                                                                                                                                                                                                                                                                     | Not applicable                                                                                                                                               |
| <b>Results</b>         |     |                                                                                                                                                                                                                                                                                                           |                                                                                                                                                              |
| Participants           | 13* | (a) Report numbers of individuals at each stage of study—eg numbers potentially eligible, examined for eligibility, confirmed eligible, included in the study, completing follow-up, and analysed                                                                                                         | Reported for quantitative component (Appendix B), including eligibility criteria (page 8)                                                                    |
|                        |     | (b) Give reasons for non-participation at each stage                                                                                                                                                                                                                                                      | Not applicable                                                                                                                                               |
|                        |     | (c) Consider use of a flow diagram                                                                                                                                                                                                                                                                        | Not applicable                                                                                                                                               |
| Descriptive data       | 14* | (a) Give characteristics of study participants (eg demographic, clinical, social) and information on exposures and potential confounders                                                                                                                                                                  | Not applicable                                                                                                                                               |
|                        |     | (b) Indicate number of participants with missing data for each variable of interest                                                                                                                                                                                                                       | Not applicable                                                                                                                                               |
|                        |     | (c) <i>Cohort study</i> —Summarise follow-up time (eg, average and total amount)                                                                                                                                                                                                                          | Reported duration of quantitative component follow-up period (page 8 and Appendix B)                                                                         |

|                          |     |                                                                                                                                                                                                              |                                                                                                                                                       |
|--------------------------|-----|--------------------------------------------------------------------------------------------------------------------------------------------------------------------------------------------------------------|-------------------------------------------------------------------------------------------------------------------------------------------------------|
| Outcome data             | 15* | <i>Cohort study</i> —Report numbers of outcome events or summary measures over time                                                                                                                          | Reported for quantitative component (Appendix B)                                                                                                      |
|                          |     | <i>Case-control study</i> —Report numbers in each exposure category, or summary measures of exposure                                                                                                         | Not applicable                                                                                                                                        |
|                          |     | <i>Cross-sectional study</i> —Report numbers of outcome events or summary measures                                                                                                                           | Not applicable                                                                                                                                        |
| Main results             | 16  | (a) Give unadjusted estimates and, if applicable, confounder-adjusted estimates and their precision (eg, 95% confidence interval). Make clear which confounders were adjusted for and why they were included | Quantitative analysis reported briefly in appendix (Appendix B). Adjusted odds ratios presented, with confidence intervals and confounding variables  |
|                          |     | (b) Report category boundaries when continuous variables were categorized                                                                                                                                    | Reported for quantitative component (Appendix B)                                                                                                      |
|                          |     | (c) If relevant, consider translating estimates of relative risk into absolute risk for a meaningful time period                                                                                             | Not applicable                                                                                                                                        |
| Other analyses           | 17  | Report other analyses done—eg analyses of subgroups and interactions, and sensitivity analyses                                                                                                               | Not applicable                                                                                                                                        |
| <b>Discussion</b>        |     |                                                                                                                                                                                                              |                                                                                                                                                       |
| Key results              | 18  | Summarise key results with reference to study objectives                                                                                                                                                     | Reported for all study components throughout discussion (page 11-15)                                                                                  |
| Limitations              | 19  | Discuss limitations of the study, taking into account sources of potential bias or imprecision. Discuss both direction and magnitude of any potential bias                                                   | Overall study limitations discussed (page 13), including specific acknowledgement of potential for bias arising from quantitative component (page 14) |
| Interpretation           | 20  | Give a cautious overall interpretation of results considering objectives, limitations, multiplicity of analyses, results from similar studies, and other relevant evidence                                   | Overall interpretation of results discussed (page 13-14)                                                                                              |
| Generalisability         | 21  | Discuss the generalisability (external validity) of the study results                                                                                                                                        | Statements on generalisability given (page 12, 14)                                                                                                    |
| <b>Other information</b> |     |                                                                                                                                                                                                              |                                                                                                                                                       |
| Funding                  | 22  | Give the source of funding and the role of the funders for the present study and, if applicable, for the original study on which the present article is based                                                | Page 15                                                                                                                                               |

\*Give information separately for cases and controls in case-control studies and, if applicable, for exposed and unexposed groups in cohort and cross-sectional studies.

1  
2 **Note:** An Explanation and Elaboration article discusses each checklist item and gives methodological background and published examples of transparent reporting. The STROBE  
3 checklist is best used in conjunction with this article (freely available on the Web sites of PLoS Medicine at <http://www.plosmedicine.org/>, Annals of Internal Medicine at  
4 <http://www.annals.org/>, and Epidemiology at <http://www.epidem.com/>). Information on the STROBE Initiative is available at [www.strobe-statement.org](http://www.strobe-statement.org).  
5  
6  
7  
8  
9  
10  
11  
12  
13  
14  
15  
16  
17  
18  
19  
20  
21  
22  
23  
24  
25  
26  
27  
28  
29  
30  
31  
32  
33  
34  
35  
36  
37  
38  
39  
40  
41  
42  
43  
44  
45  
46

For peer review only
